# Supplementary material for: Extending lead-free organic–inorganic semiconducting materials to new polymeric structures: 2,2′-bipyridinium iodoantimonate and quinoxalinium iodobismuthate
Source: Royal Society of Chemistry journal article supplement (doi:10.1039/d5ra06189j), 2025-01-01
Supplement: d5ra06189j1.pdf [file d5ra06189j1.pdf]

## Supplementary Information

### Extending lead-free organic-inorganic semiconducting materials to new polymeric structures: 2,2'-bipyridinium iodoantimonate and quinoxalinium iodobismuthate

Chakib Hrizi,<sup>a,\*</sup> Monia Hamdouni,<sup>a</sup> Marwa Essid,<sup>a</sup> Mourad Nouri,<sup>b</sup> Abderrahim Khatyr,<sup>c</sup> Michael Knorr,<sup>c</sup> Lydie Viau,<sup>c</sup> Annika Schmidt,<sup>d</sup> Carsten Strohmann<sup>d</sup> and Slaheddine Chaabouni<sup>e</sup>

<sup>a</sup>Research Unit Advanced Materials, Applied Mechanics, Innovative Processes, and Environment, UR22ES04, Higher Institute of Applied Sciences and Technology of Gabes, University of Gabes, Tunisia.

<sup>b</sup>Laboratory of Physics of Materials and Nanomaterials Applied at Environment, Faculty of Science of Gabes, University of Gabes, Gabes, Tunisia

<sup>c</sup>Institut UTINAM UMR 6213 CNRS, Université Marie et Louis Pasteur, 16, Route de Gray, 25030 Besançon, France.

<sup>d</sup>Anorganische Chemie, Technische Universität Dortmund, Otto-Hahn Straße 6, 44227 Dortmund, Germany.

<sup>e</sup>Laboratoire des Sciences des Matériaux et de l'Environnement, Faculté des Sciences de Sfax, Université de Sfax, BP 1171, 3000 Sfax, Tunisia.

**\*Corresponding Author**, Email: *h\_chakib1212@yahoo.fr*

## Table of contents

**Figure S1.** Comparison of the experimental PXRD pattern of (bpy-H)SbI<sub>4</sub> (**1**) compound with the simulated one.

**Figure S2.** Comparison of the experimental PXRD pattern of (Qx-H)<sub>2</sub>[BiI<sub>4</sub>]<sub>2</sub>.CH<sub>3</sub>OH (**2**) compound with the simulated one.

**Figure S3.** DSC curve for **1** at the rate of 5 °C/min upon cooling and heating.

**Figure S4.** DSC curve for **2** at the rate of 5 °C/min upon cooling and heating.

**Figure S5.** Illustration of H-bond contacts in compound **1** (dashed lines) between anionic 1D chains and 2,2'-bipyridinium cations showing H···I (<3.10 Å) interactions between molecular units.

**Figure S6.** The crystal structure of the compounds (2,2'-Hbpy)<sub>4</sub>Sb<sub>4</sub>X<sub>20</sub> (X=Br and Cl): part of the tetramer [Sb<sub>4</sub>X<sub>20</sub>]<sup>8-</sup>; illustration of [Sb<sub>4</sub>X<sub>20</sub>]<sup>8-</sup>···[Sb<sub>4</sub>X<sub>20</sub>]<sup>8-</sup> contacts (dashed lines) between the anionic tetramers showing Br···Br (<3.92 Å) and Cl···Cl (<3.62 Å) interactions between molecular units.

**Figure S7.** Disorder in quinoxalinium cation.

**Figure S8.** Illustration of H-bond contacts in compound **2** (dashed lines) between anionic 1D chains, MeOH molecules and quinoxalinium cations showing H···I and H···O (<3.10 Å) interactions between molecular units.

**Fig. S9.** Compound **1**: Decomposed Hirshfeld surfaces (mapped with  $d_e$  and shape index) and 2D-fingerprint plots resolved into defined contacts showing percentages of contacts contributed on the total Hirshfeld surface area of the molecule. The colored area in the middle shows the interactions between organic molecules and anionic units. The area above shows the interactions between organic molecules, and the area below shows the interactions between anionic units.

**Fig. S10.** Compound **2**: Decomposed Hirshfeld surfaces and 2D-fingerprint plots of different interactions. The blue colored area shows the interactions between organic molecules and anionic units. The green colored area shows the interactions between organic cations and methanol molecules. The top-left HS and FP show the interactions between organic molecules. The bottom HS and FP show the interactions between anionic units.

**Figure S11.** IR spectrum at room temperature for **1**

**Figure S12.** IR spectrum at room temperature for **2**

**Figure S13.** UV–Vis absorption spectra for **1** measured and their Gaussian decomposition.

**Figure S14.** Tauc plots of the absorbance data for an indirect allowed transition in **1** and **2**. Fits to the linear portions of the plots give the indirect bandgaps as 2.038 eV for **1** and 1.912 eV for **2**.

**Figure S15.** UV–Vis absorption spectra for **2** measured and their Gaussian decomposition.

**Figure S16.** Normalized excitation spectra of (A) **1** ( $\lambda_{\text{em}} = 470$  nm) and (B) **2** ( $\lambda_{\text{em}} = 460$  nm) recorded in CH<sub>3</sub>CN at 298 K.

**Figure S17.** Normalized excitation spectra of (A) **1** ( $\lambda_{\text{em}} = 530$  nm) and (B) **2** ( $\lambda_{\text{em}} = 450$  nm) recorded in solid-state at 298 K.

**Figure S18.** Normalized absorption and emission spectra of (Qx-H)Cl recorded in CH<sub>3</sub>CN at 298 K.

**Figure S19.** (A) Emission decay, (B) best fit and (C) residuals of (Qx-H)Cl in CH<sub>3</sub>CN at rt;  $\chi^2 = 1.135$ .

**Figure S20.** (A) Emission decay, (B) best fit and (C) residuals of (Qx-H)Cl in solid-state at rt;  $\chi^2 = 1.072$ .

**Figure S21.** (A) Emission decay, (B) best fit and (C) residuals of **1** in CH<sub>3</sub>CN at rt;  $\chi^2 = 1.026$ .

**Figure S22.** (A) Emission decay, (B) best fit and (C) residuals of **2** in CH<sub>3</sub>CN at rt;  $\chi^2 = 1.000$ .

**Figure S23.** (A) Emission decay, (B) best fit and (C) residuals of **1** in solid-state at rt;  $\chi^2 = 1.238$

**Figure S24.** (A) Emission decay, (B) best fit and (C) residuals of **2** in solid-state at rt;  $\chi^2 = 1.128$ .

**Table S1.** Selected interatomic distances (Å) and angles (°) in the (bpy-H<sup>+</sup>) cation of **1**.

**Table S2.** Hydrogen bonds geometry (Å, °) for the compound **1**.

**Table S3.** Selected interatomic distances (Å) and angles (°) in the (Qx-H<sup>+</sup>) cation and MeOH of **2**.

**Table S4.** Hydrogen bonds geometry (Å, °) for the compound **2**.

**Table S5.** Frequencies (cm<sup>-1</sup>) of the observed Raman and infrared bands of **1** and proposed assignments.

**Table S6.** Frequencies (cm<sup>-1</sup>) of the observed Raman and infrared bands of **2** and proposed assignments.

## References

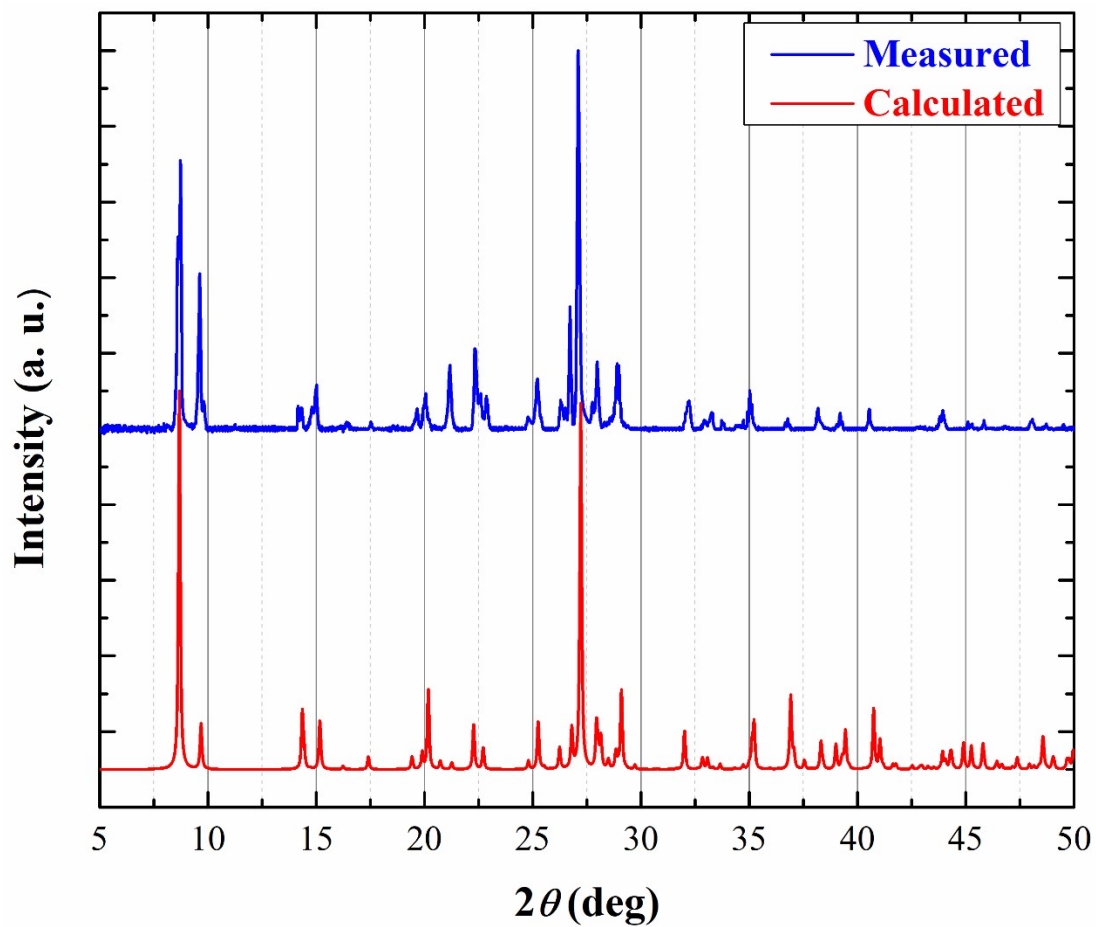

**Figure S1.** Comparison of the experimental PXRD pattern of (bpy-H)SbI<sub>4</sub> (**1**) compound with the simulated one.

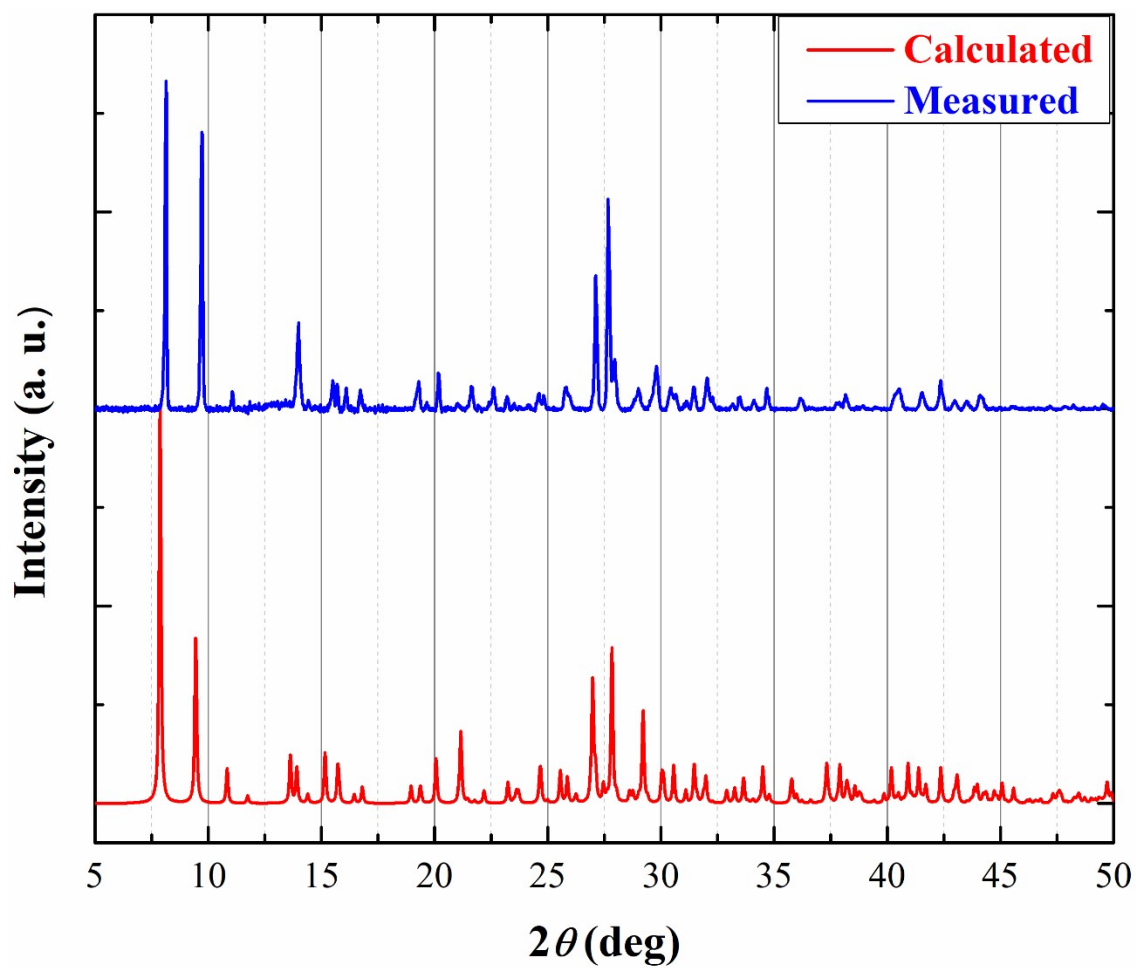

**Figure S2.** Comparison of the experimental PXRD pattern of  $(\text{Qx-H})_2[\text{BiI}_4]_2 \cdot \text{CH}_3\text{OH}$  (**2**) compound with the simulated one.

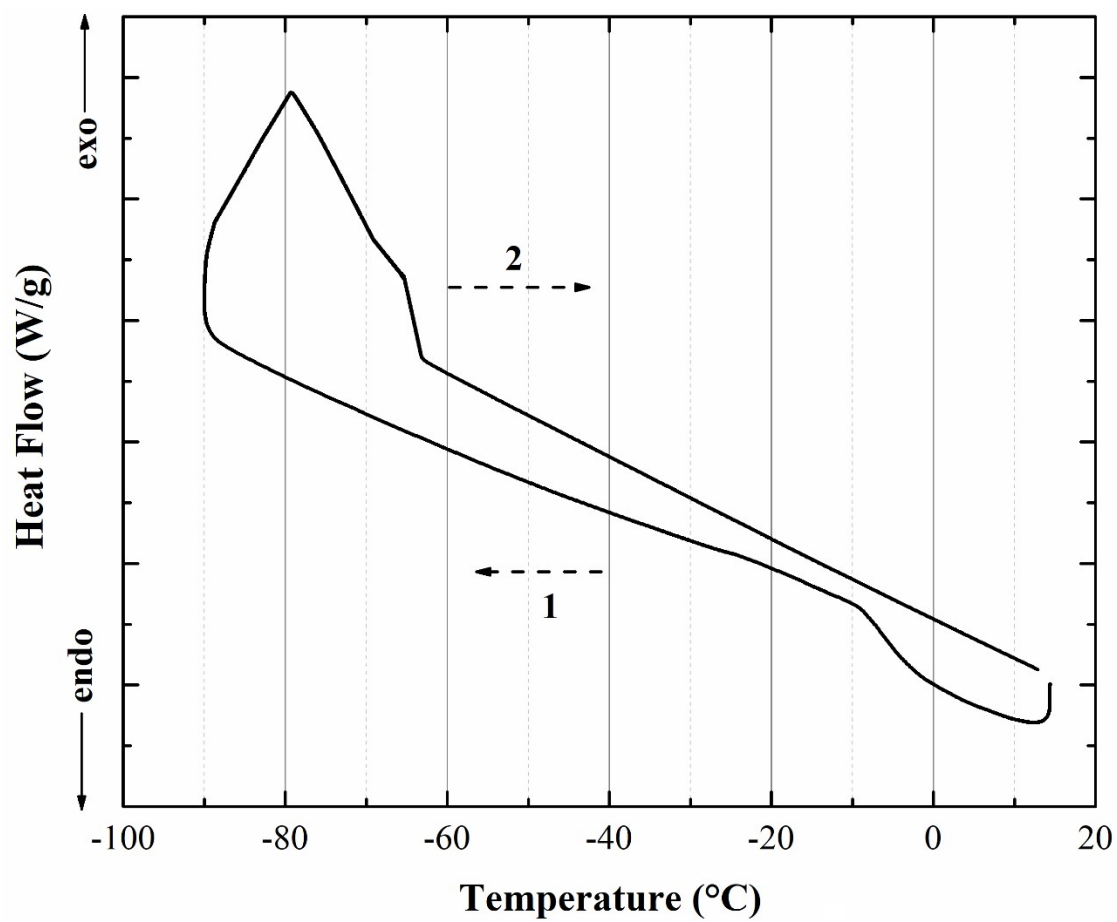

**Figure S3.** DSC curve for **1** at the rate of 5 °C/min upon cooling and heating.

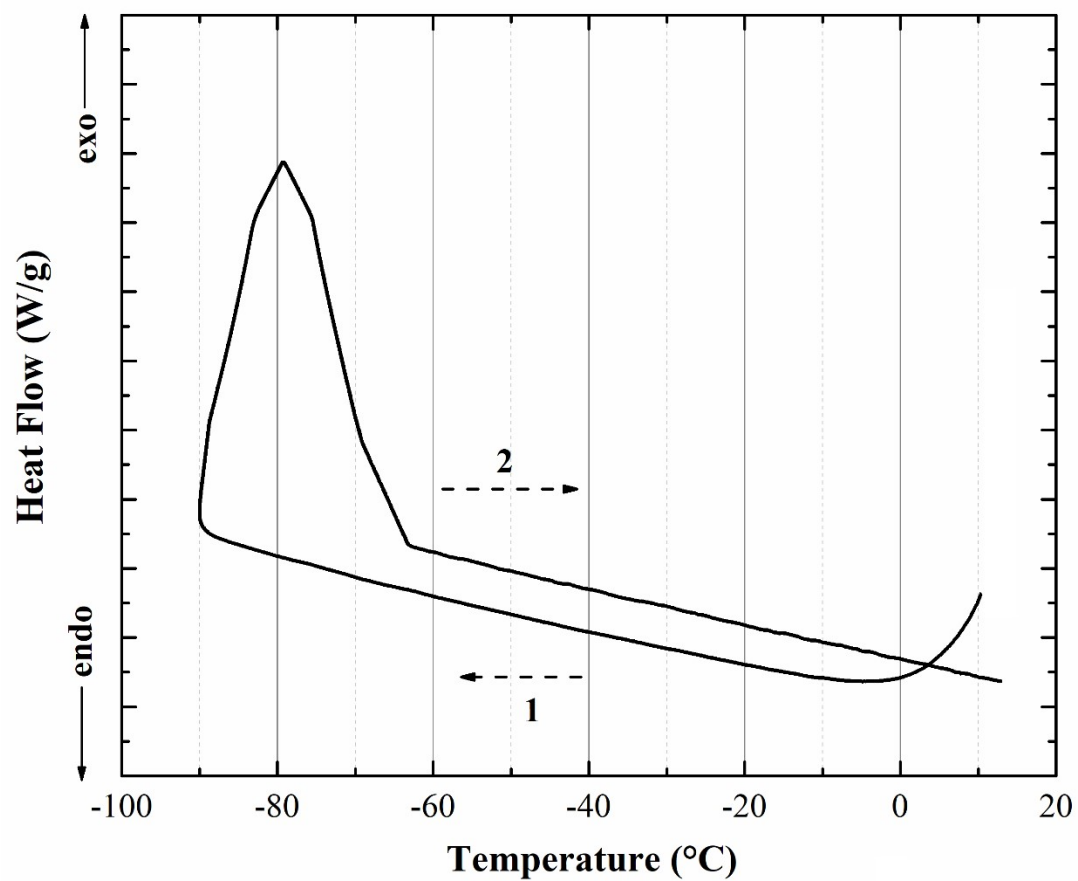

**Figure S4.** DSC curve for **2** at the rate of 5 °C/min upon cooling and heating.

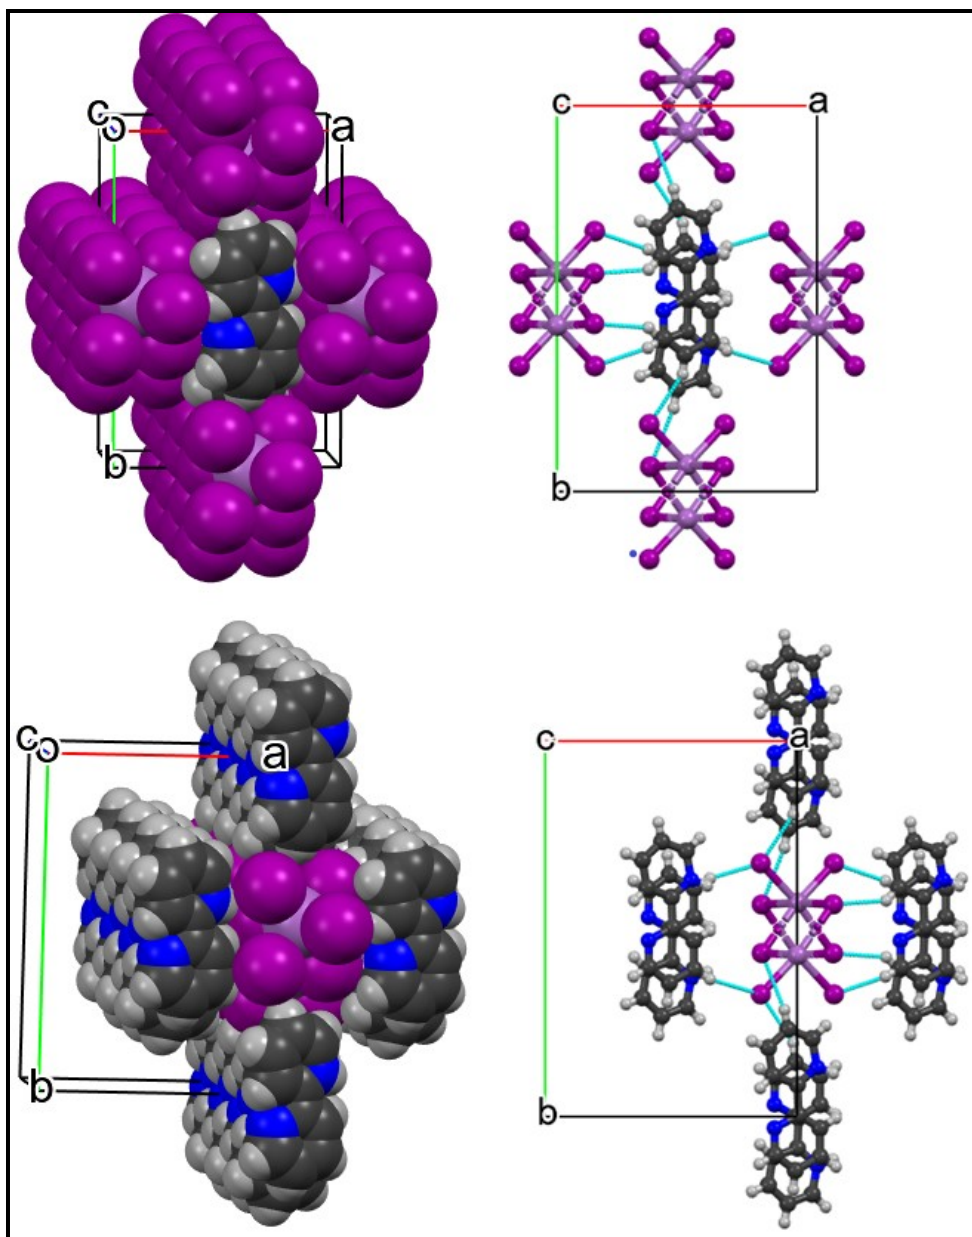

**Figure S5.** Illustration of H-bond contacts in compound **1** (dashed lines) between anionic 1D chains and 2,2'-bipyridinium cations showing  $\text{H}\cdots\text{I}$  ( $<3.10 \text{ \AA}$ ) interactions between molecular units.



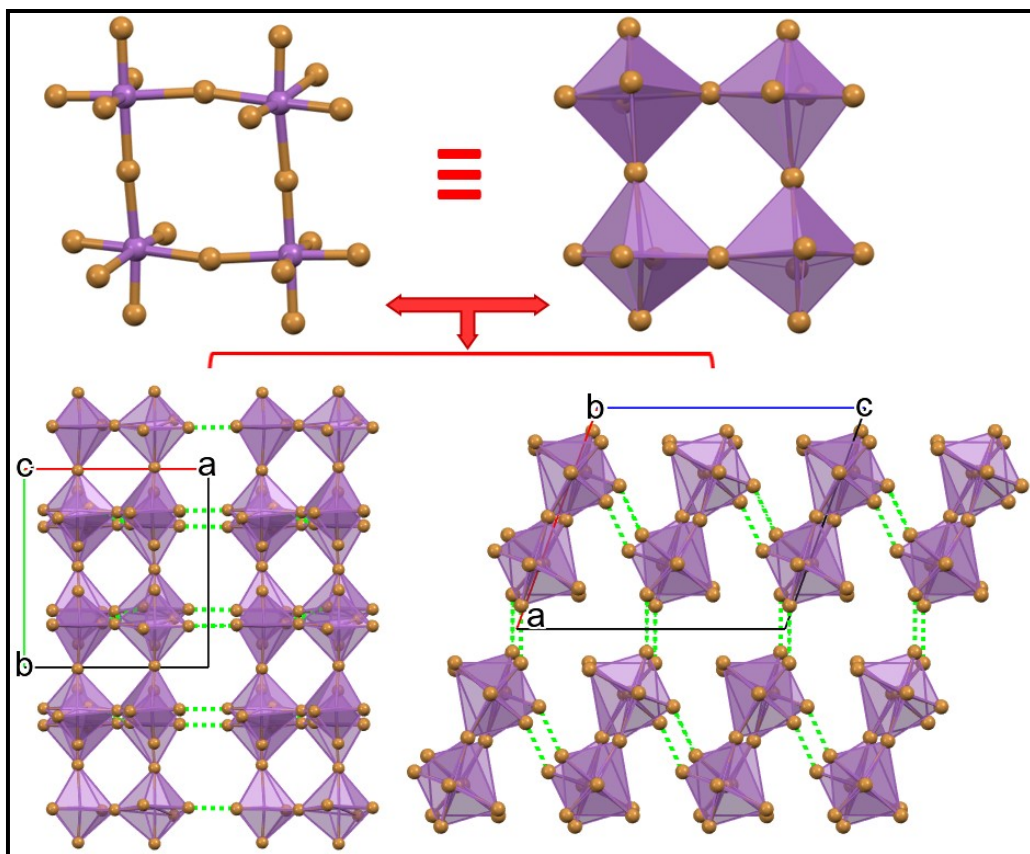

**Figure S6.** The crystal structure of the compounds  $(2,2'\text{-Hbpy})_4\text{Sb}_4\text{X}_{20}$  ( $\text{X}=\text{Br}$  and  $\text{Cl}$ ): part of the tetramer  $[\text{Sb}_4\text{X}_{20}]^{8-}$ ; illustration of  $[\text{Sb}_4\text{X}_{20}]^{8-}\cdots[\text{Sb}_4\text{X}_{20}]^{8-}$  contacts (dashed lines) between the anionic tetramers showing  $\text{Br}\cdots\text{Br}$  ( $<3.92\text{ \AA}$ ) and  $\text{Cl}\cdots\text{Cl}$  ( $<3.62\text{ \AA}$ ) interactions between molecular units<sup>1,2</sup>.

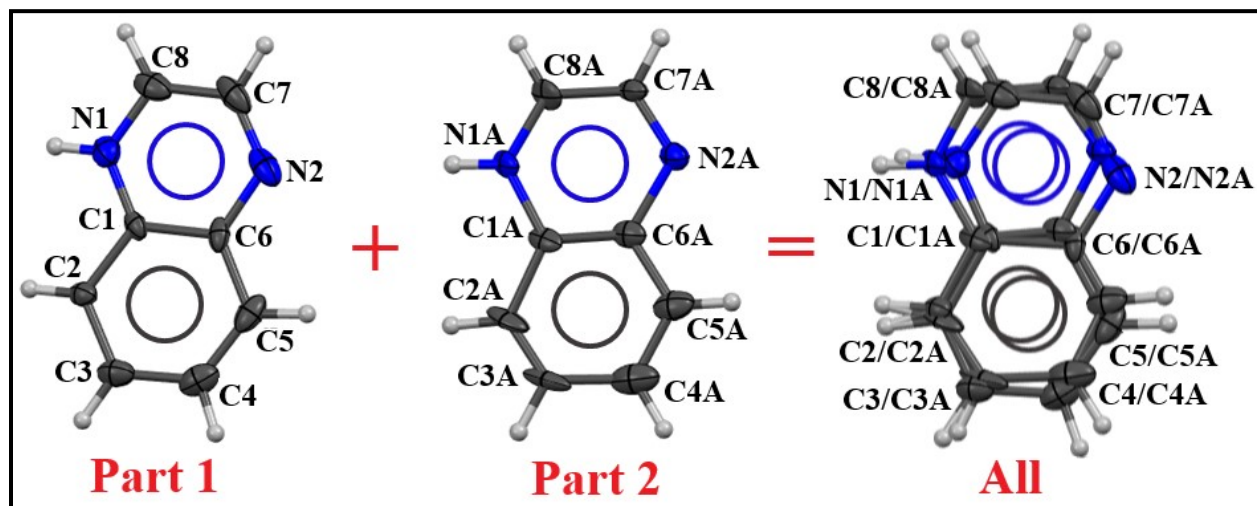

**Figure S7.** Disorder in quinoxalinium cation.

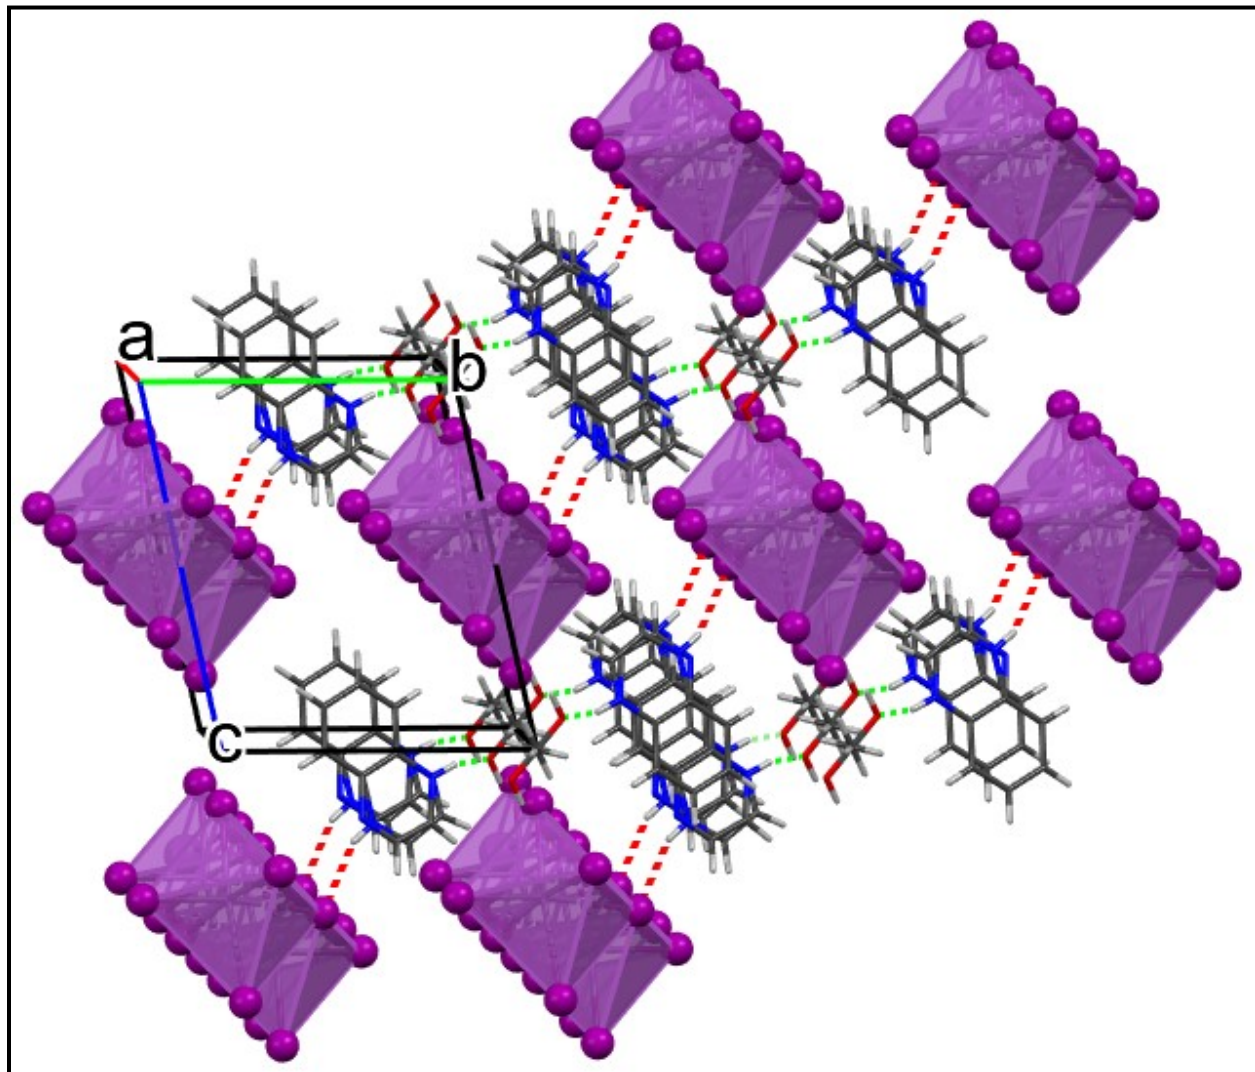

**Figure S8.** Illustration of H-bond contacts in compound **2** (dashed lines) between anionic 1D chains, MeOH molecules and quinoxalium cations showing  $\text{H}\cdots\text{I}$  and  $\text{H}\cdots\text{O}$  ( $<3.10 \text{ \AA}$ ) interactions between molecular units.

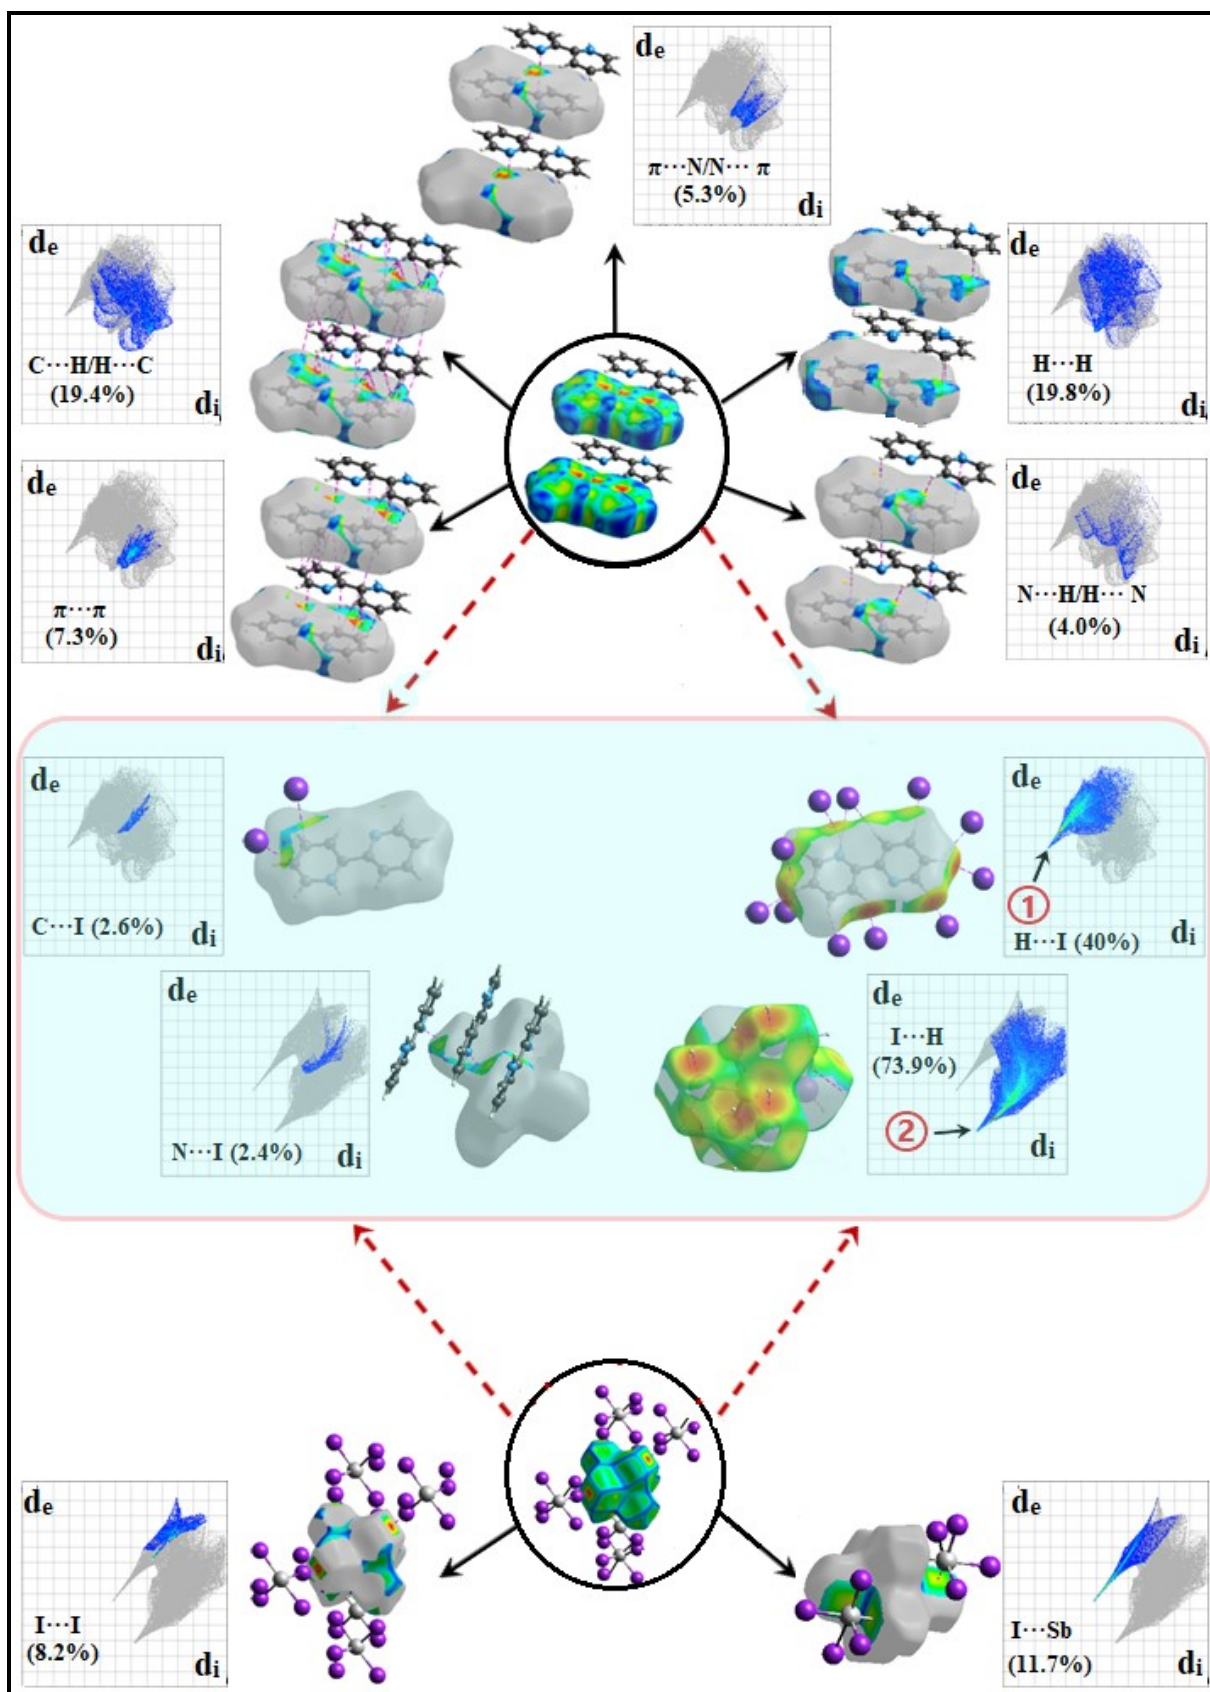

**Fig. S9.** Compound **1**: Decomposed Hirshfeld surfaces (mapped with  $d_e$  and shape index) and 2D-fingerprint plots resolved into defined contacts showing percentages of contacts contributed on the total Hirshfeld surface area of the molecule. The colored area in the middle shows the interactions between organic molecules and anionic units. The area above shows the interactions between organic molecules, and the area below shows the interactions between anionic units.



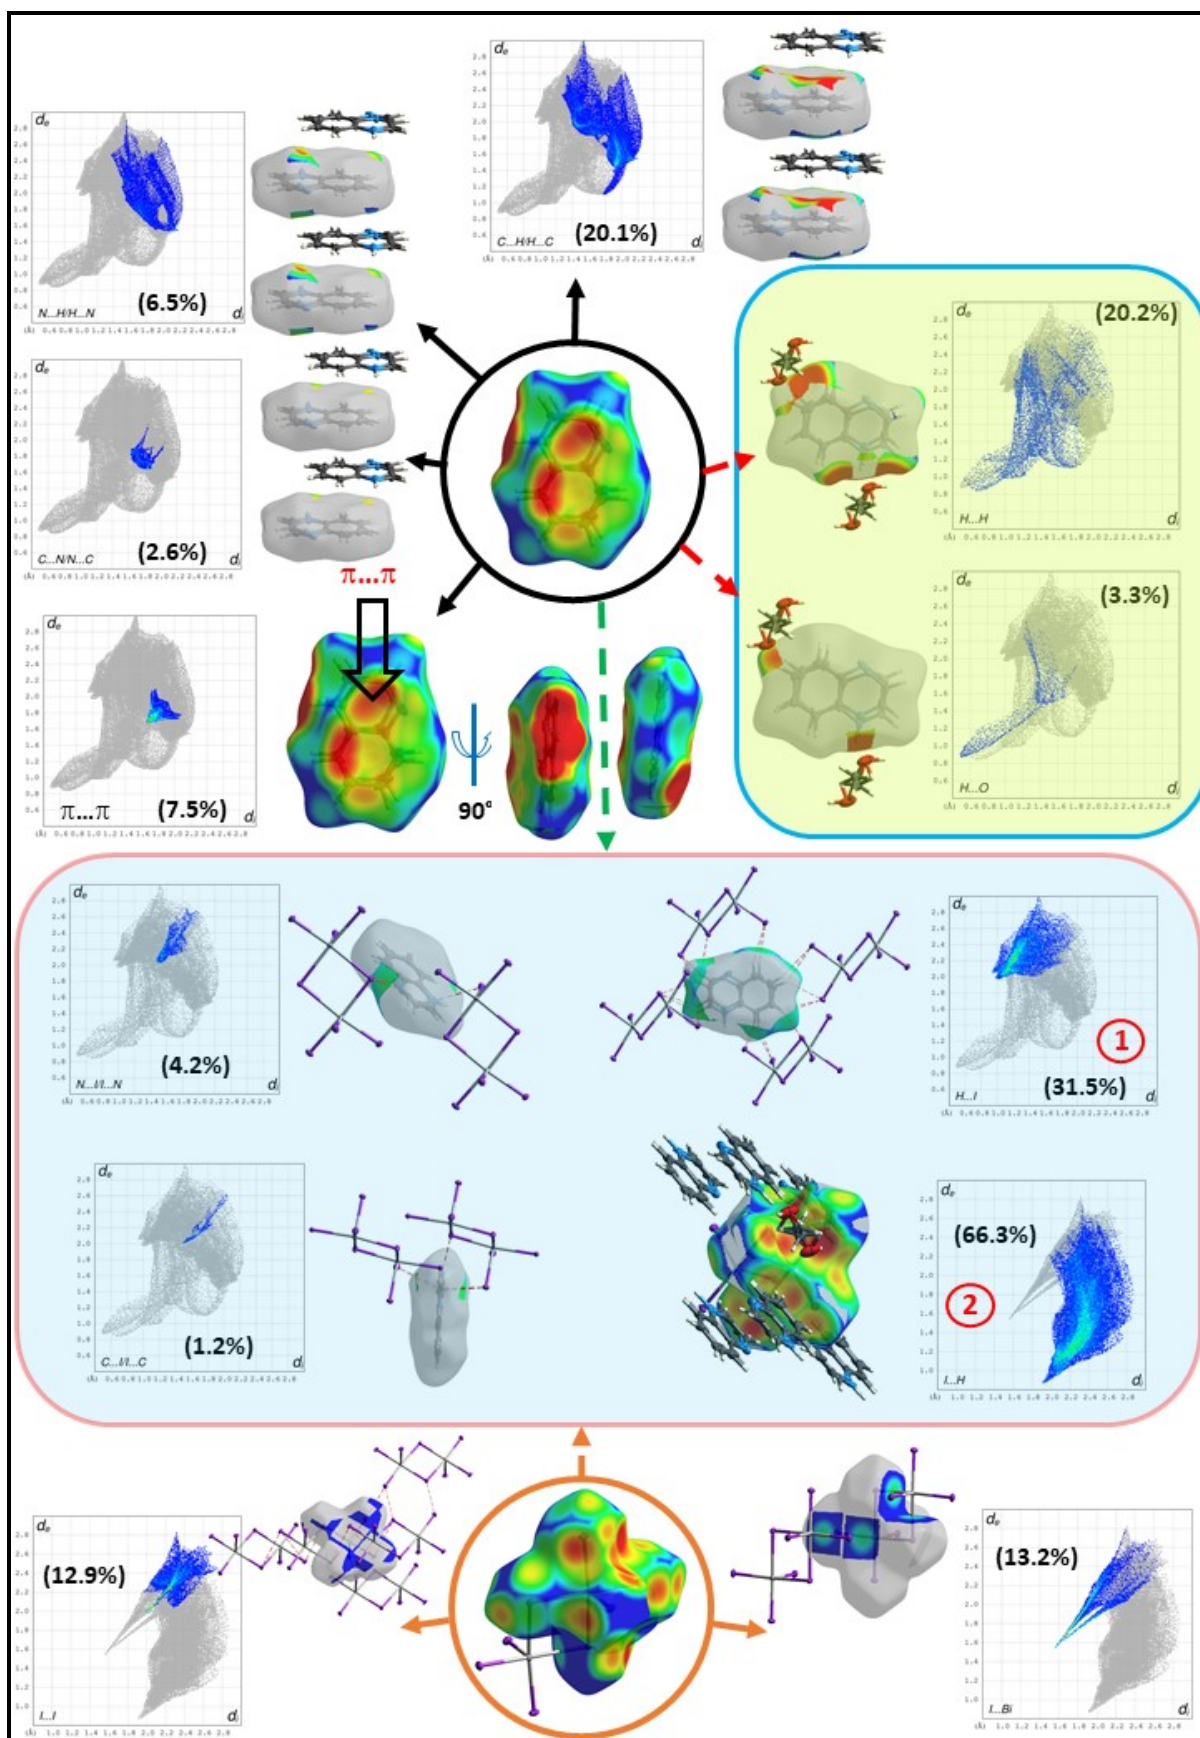

**Fig. S10.** Compound **2**: Decomposed Hirshfeld surfaces and 2D-fingerprint plots of different interactions. The blue colored area shows the interactions between organic molecules and anionic units. The green colored area shows the interactions between organic cations and methanol molecules. The top-left HS and FP show the interactions between organic molecules. The bottom HS and FP show the interactions between anionic units.

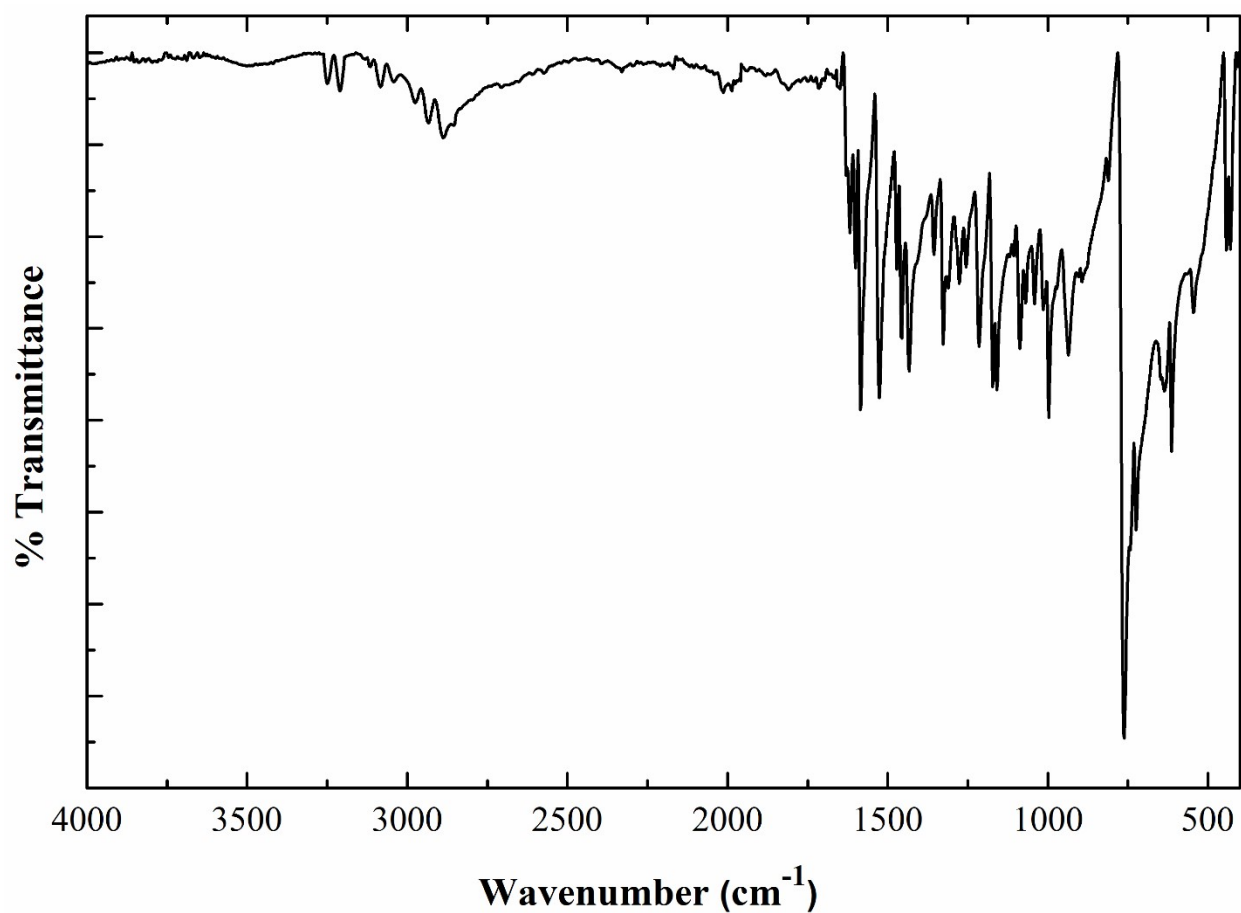

**Figure S11.** IR spectrum at room temperature for **1**

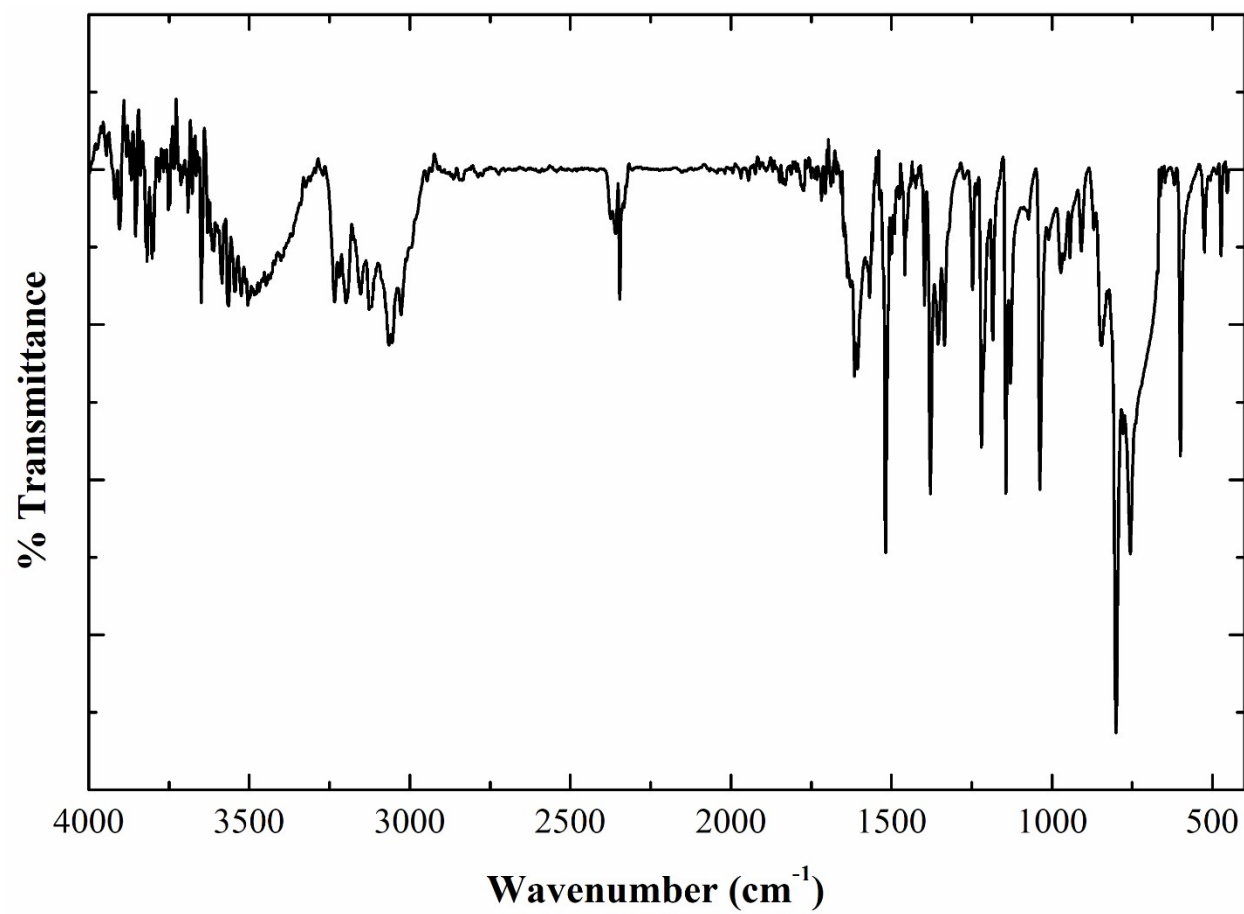

**Figure S12.** IR spectrum at room temperature for **2**

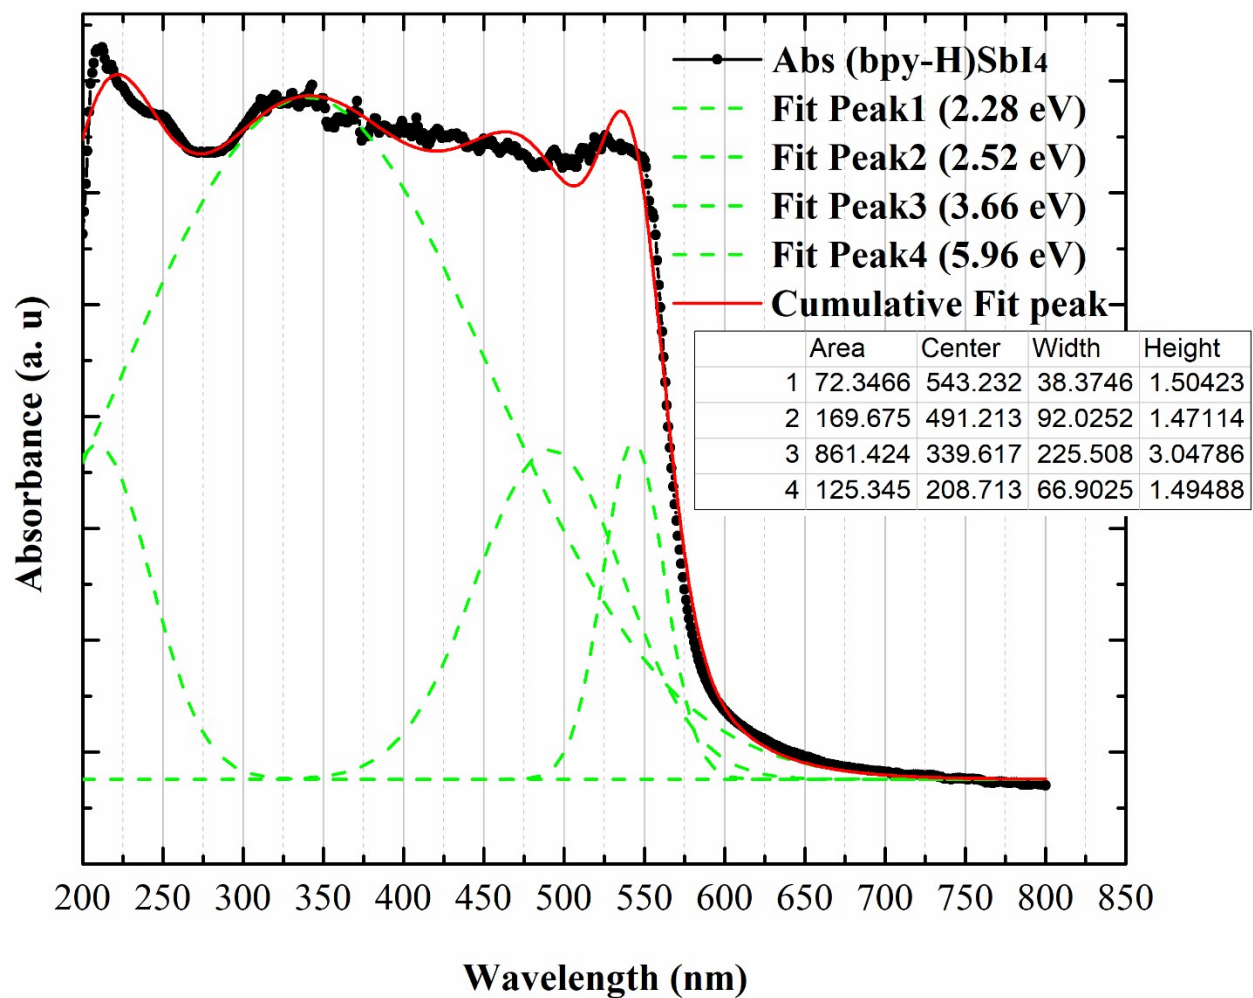

**Figure S13.** UV–Vis absorption spectra for **1** measured and their Gaussian decomposition.



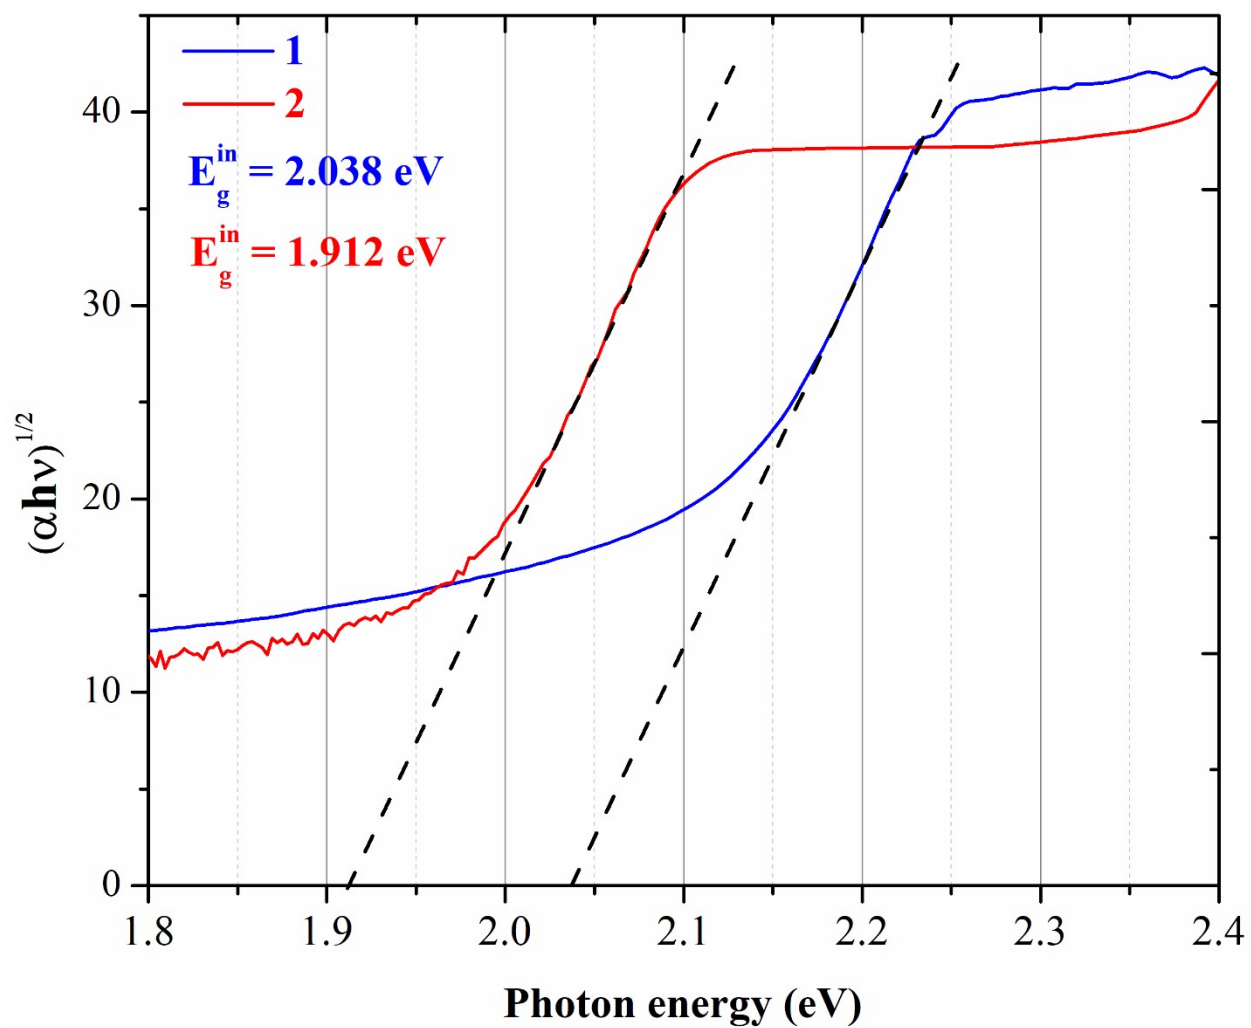

**Figure S14.** Tauc plots of the absorbance data for an indirect allowed transition in **1** and **2**. Fits to the linear portions of the plots give the indirect bandgaps as 2.038 eV for **1** and 1.912 eV for **2**.

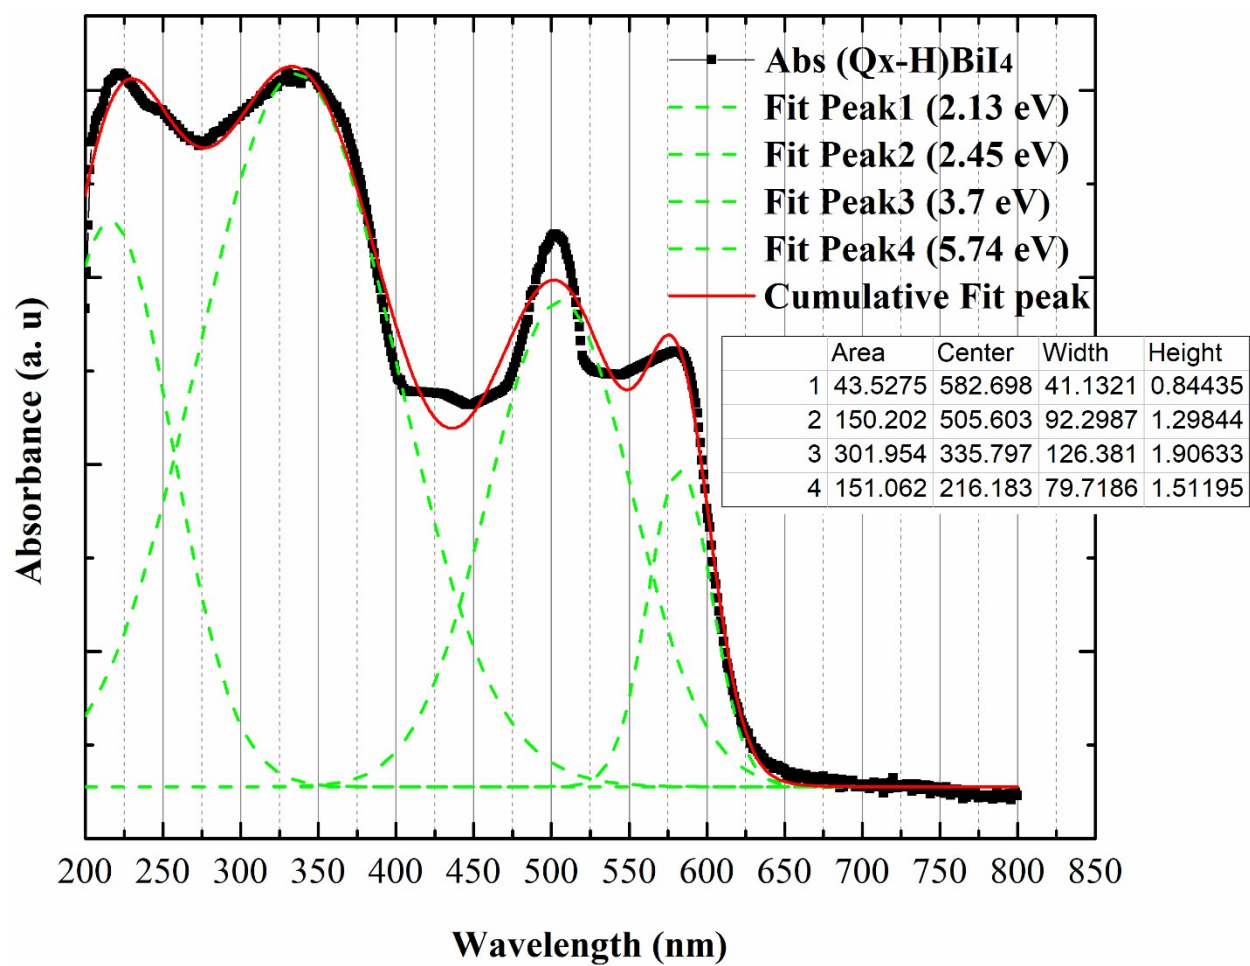

**Figure S15.** UV–Vis absorption spectra for **2** measured and their Gaussian decomposition.

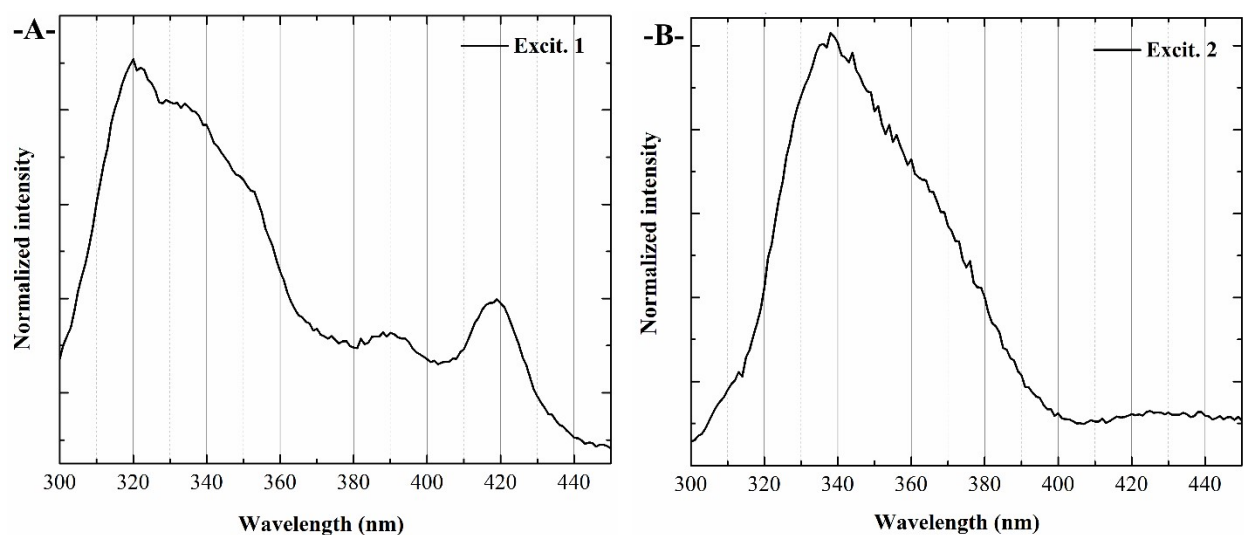

**Figure S16.** Normalized excitation spectra of (A) **1** ( $\lambda_{\text{em}} = 470$  nm) and (B) **2** ( $\lambda_{\text{em}} = 460$  nm) recorded in CH<sub>3</sub>CN at 298 K.

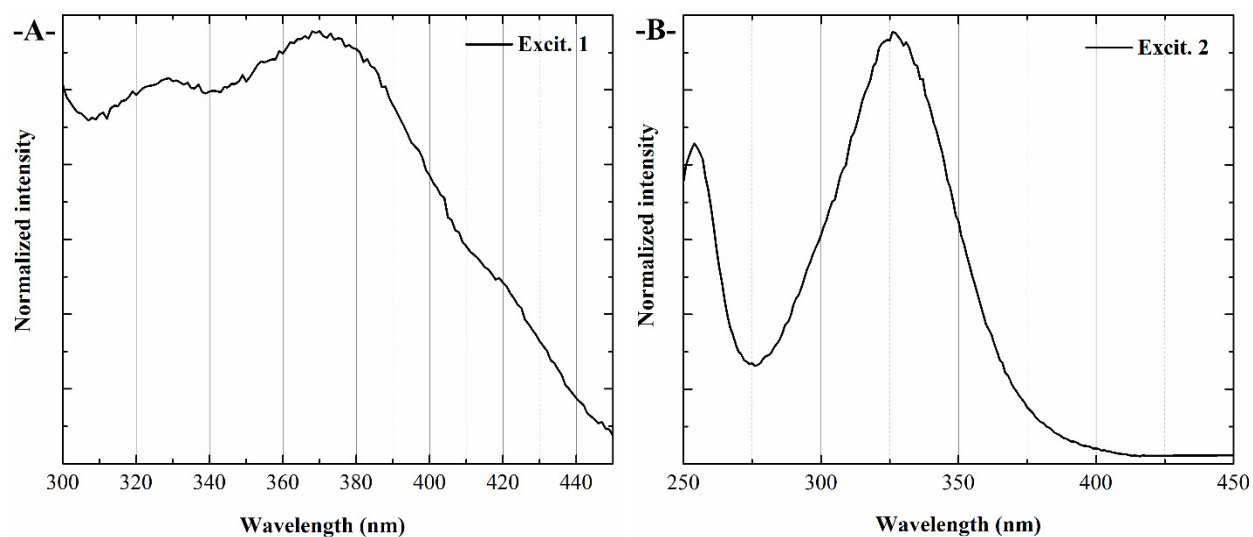

**Figure S17.** Normalized excitation spectra of (A) **1** ( $\lambda_{\text{em}} = 530$  nm) and (B) **2** ( $\lambda_{\text{em}} = 450$  nm) recorded in solid-state at 298 K.

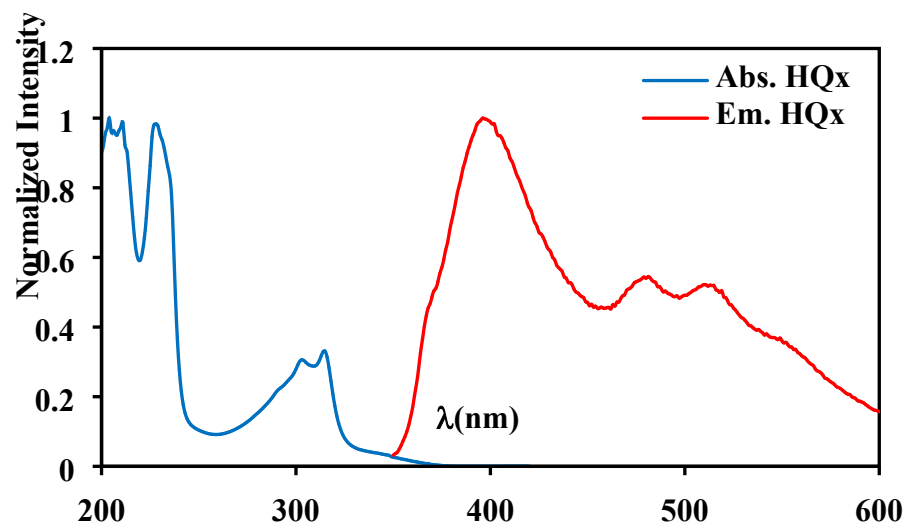

**Figure S18.** Normalized absorption and emission spectra of (Qx-H)Cl recorded in CH<sub>3</sub>CN at 298 K.

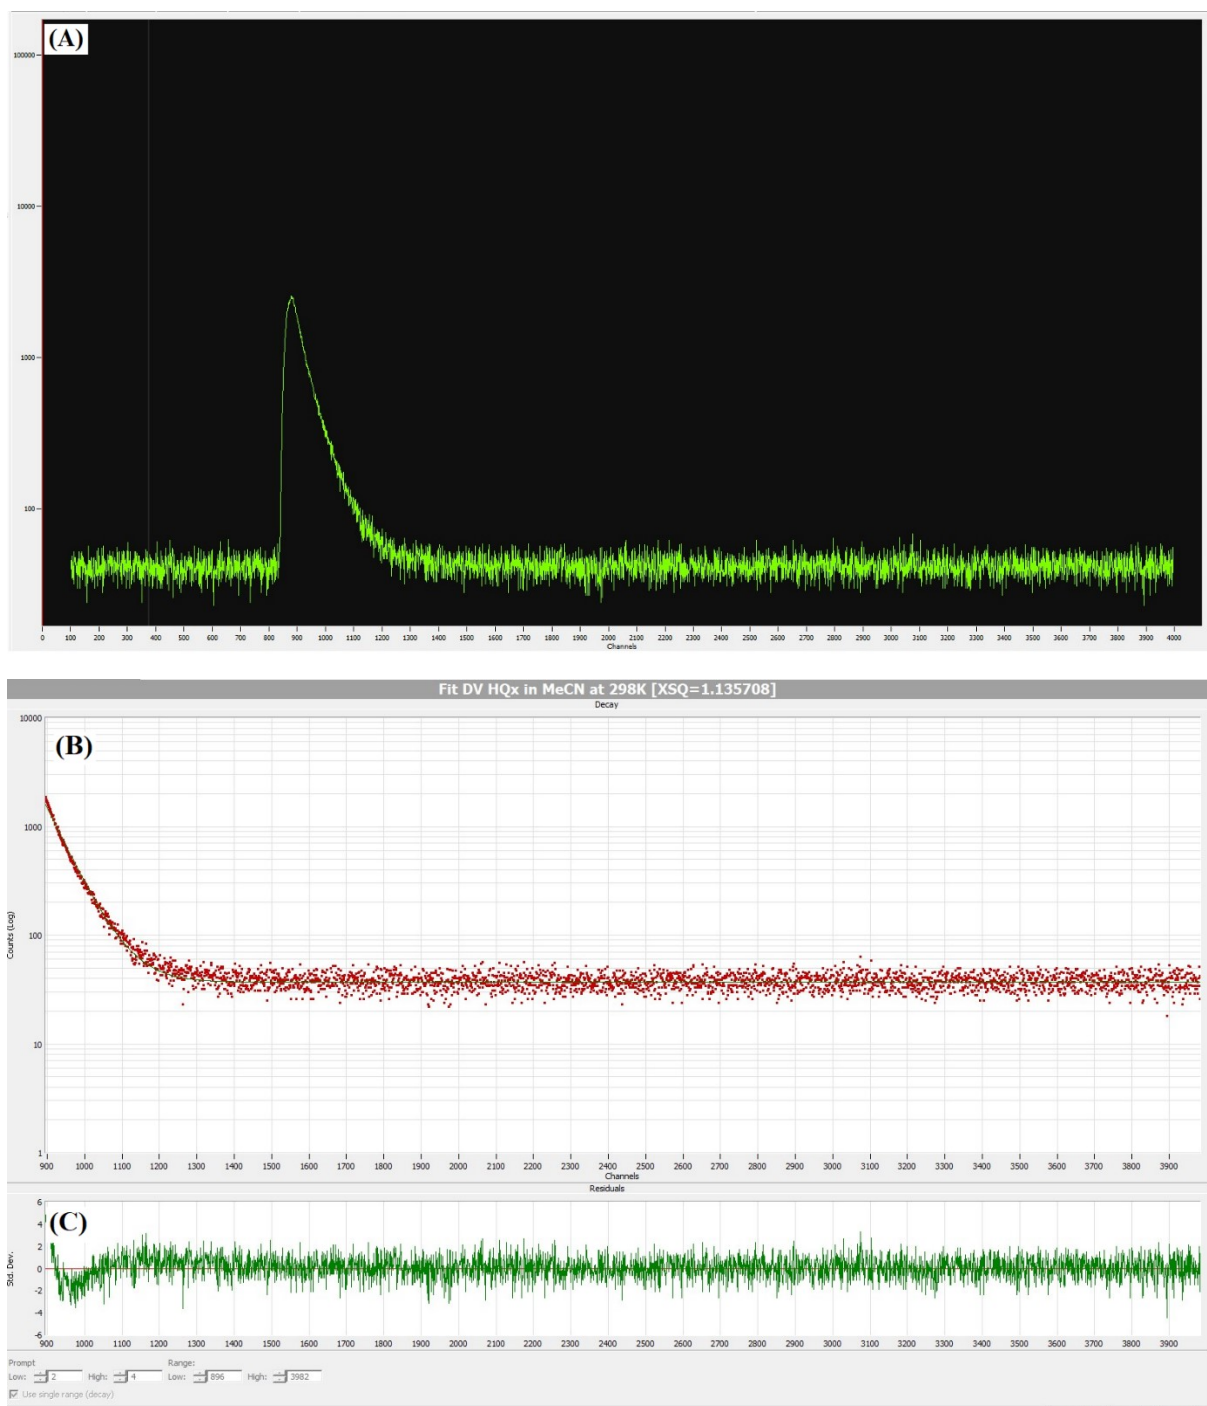

**Figure S19.** (A) Emission decay, (B) best fit and (C) residuals of (Qx-H)Cl in CH<sub>3</sub>CN at rt;  $\chi^2 = 1.135$ .

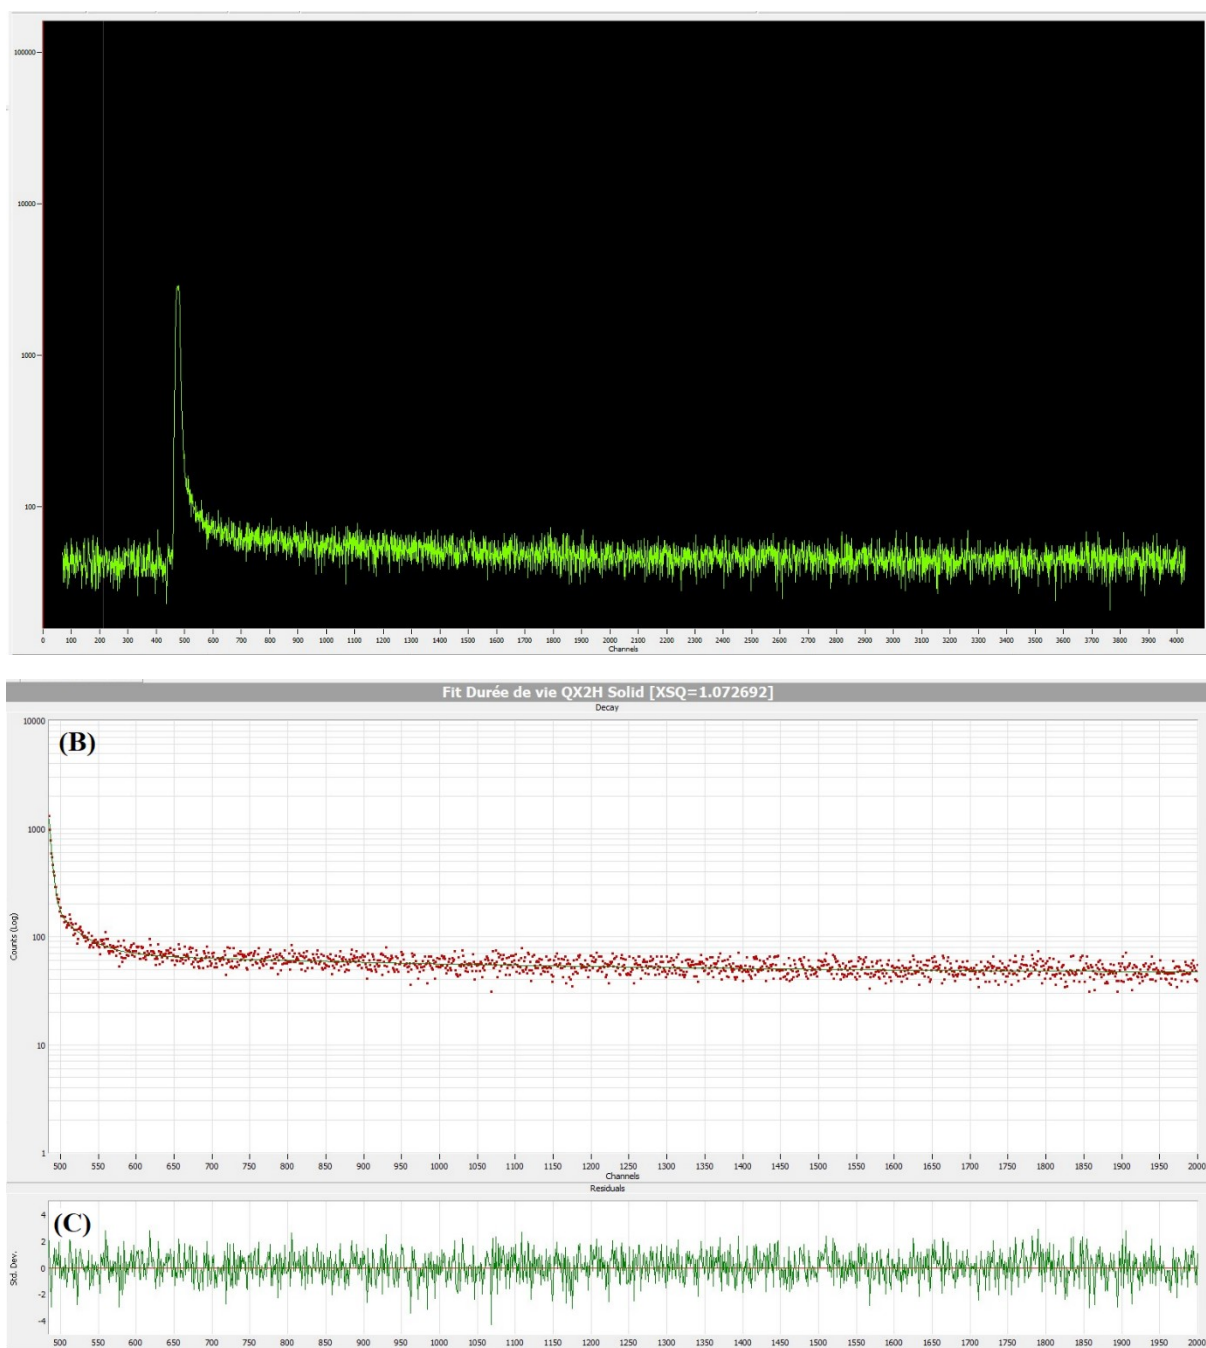

**Figure S20.** (A) Emission decay, (B) best fit and (C) residuals of (Q<sub>x</sub>-H)Cl in solid-state at rt;  $\chi^2 = 1.072$ .

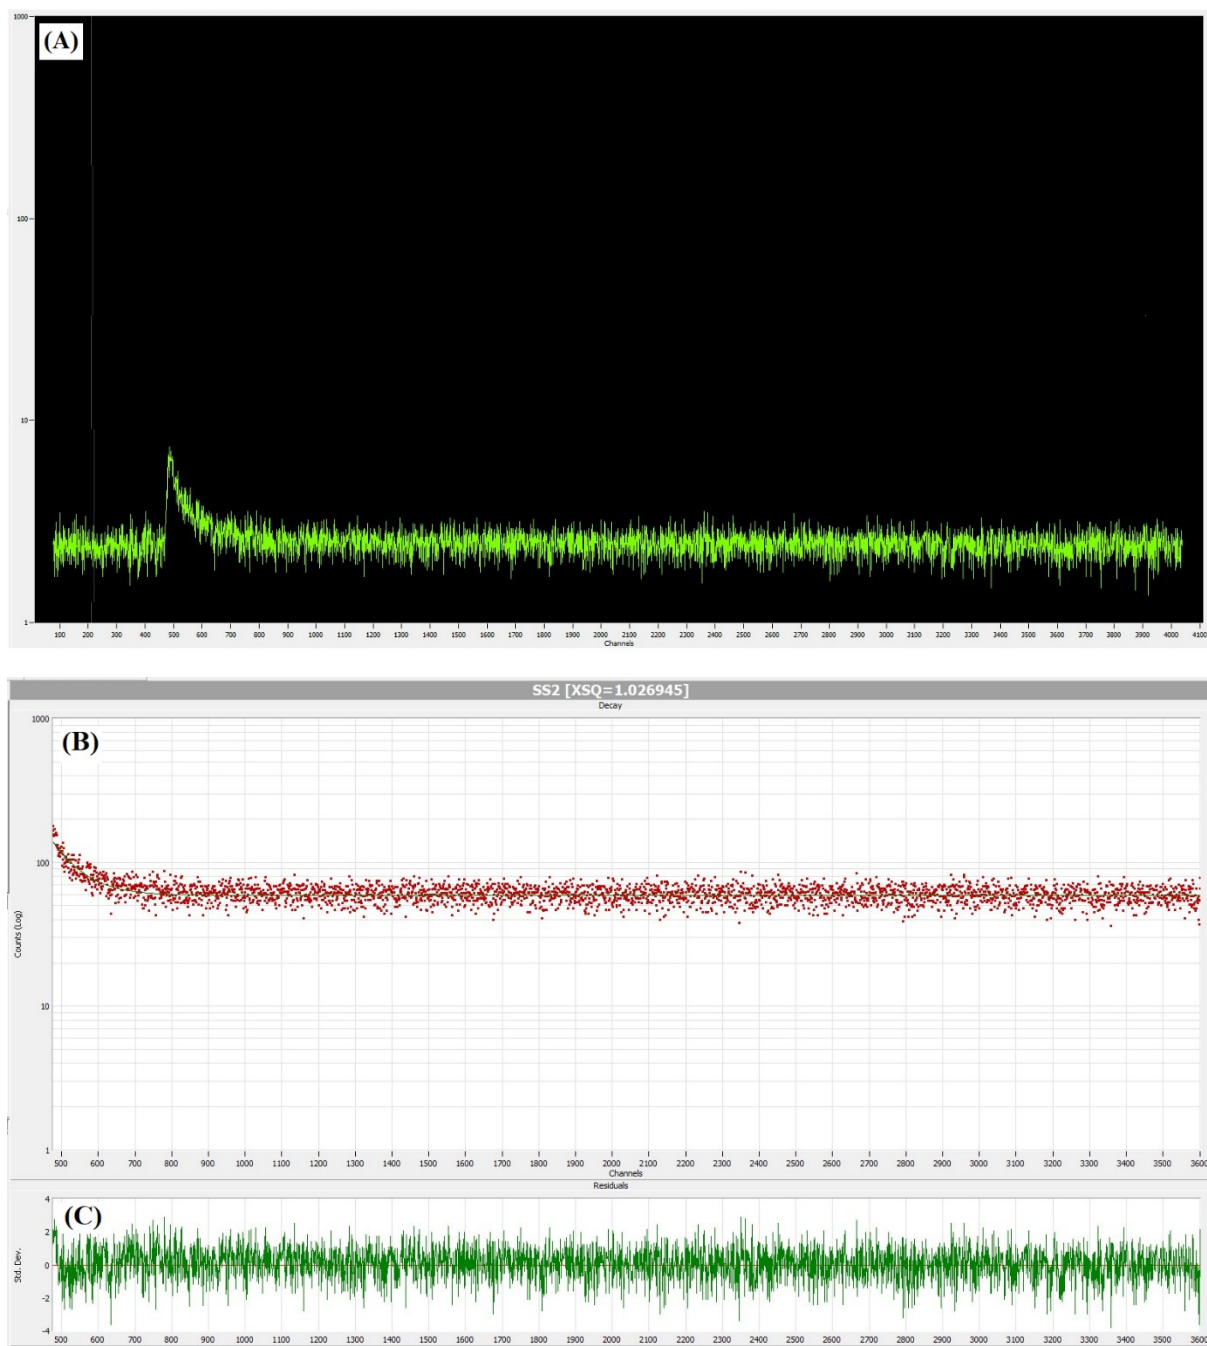

**Figure S21.** (A) Emission decay, (B) best fit and (C) residuals of **1** in CH<sub>3</sub>CN at rt;  $\chi^2 = 1.026$ .



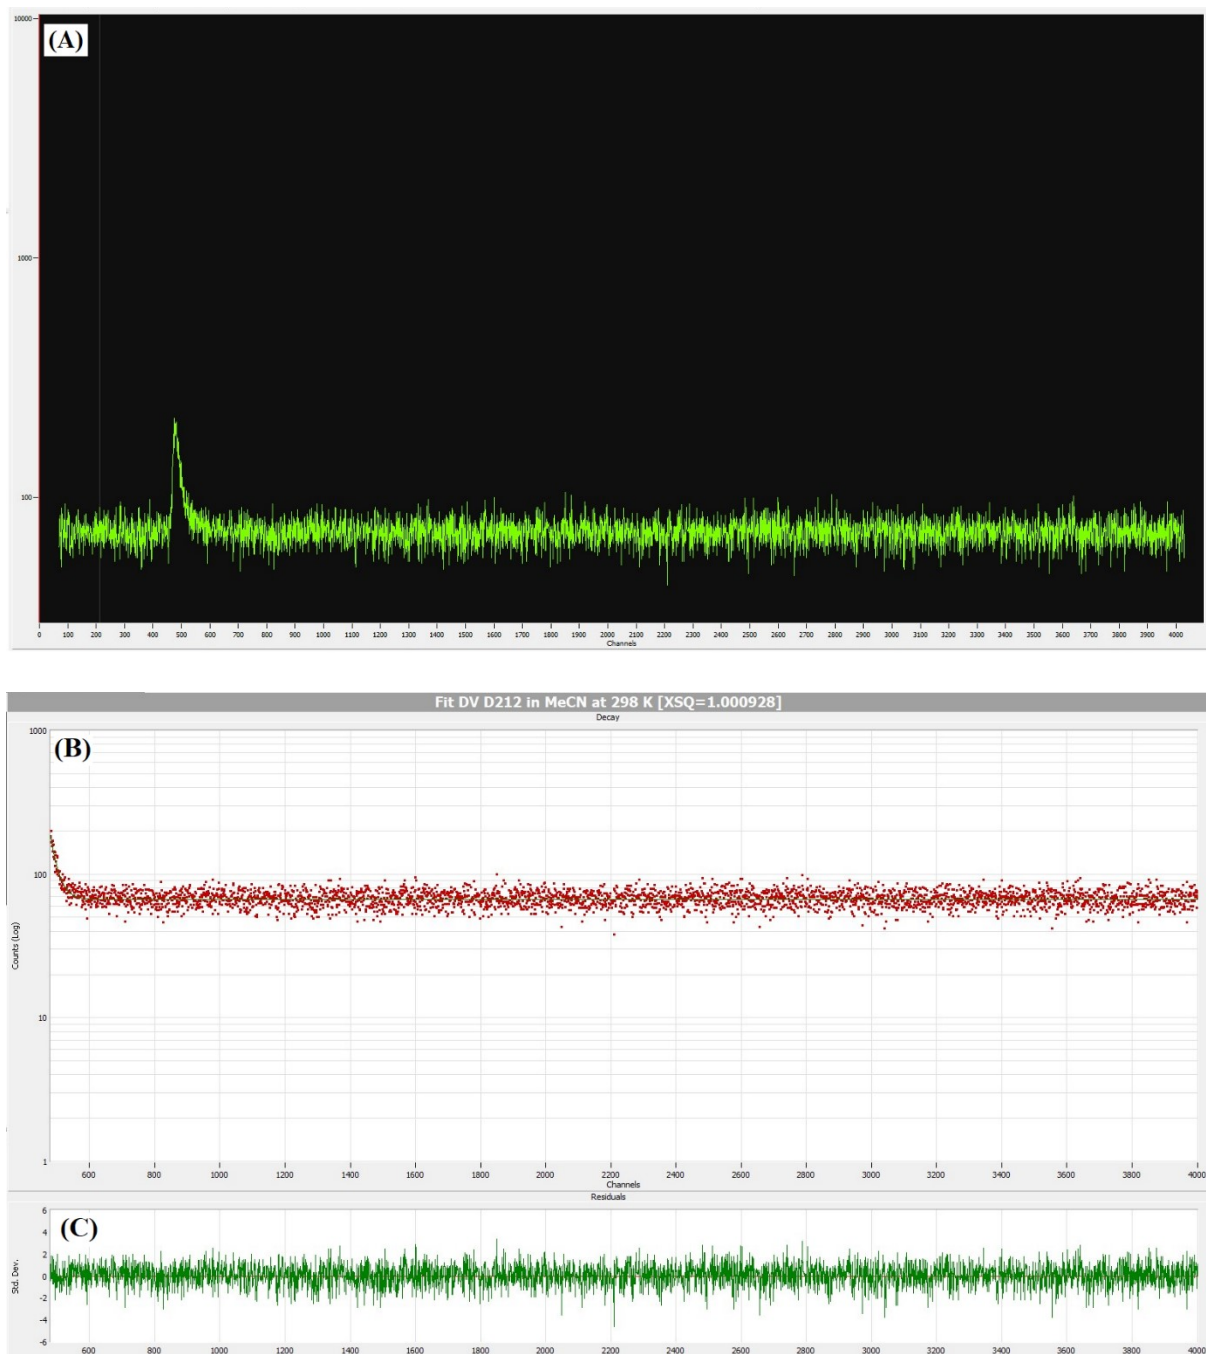

**Figure S22.** (A) Emission decay, (B) best fit and (C) residuals of **2** in CH<sub>3</sub>CN at rt;  $\chi^2 = 1.000$ .



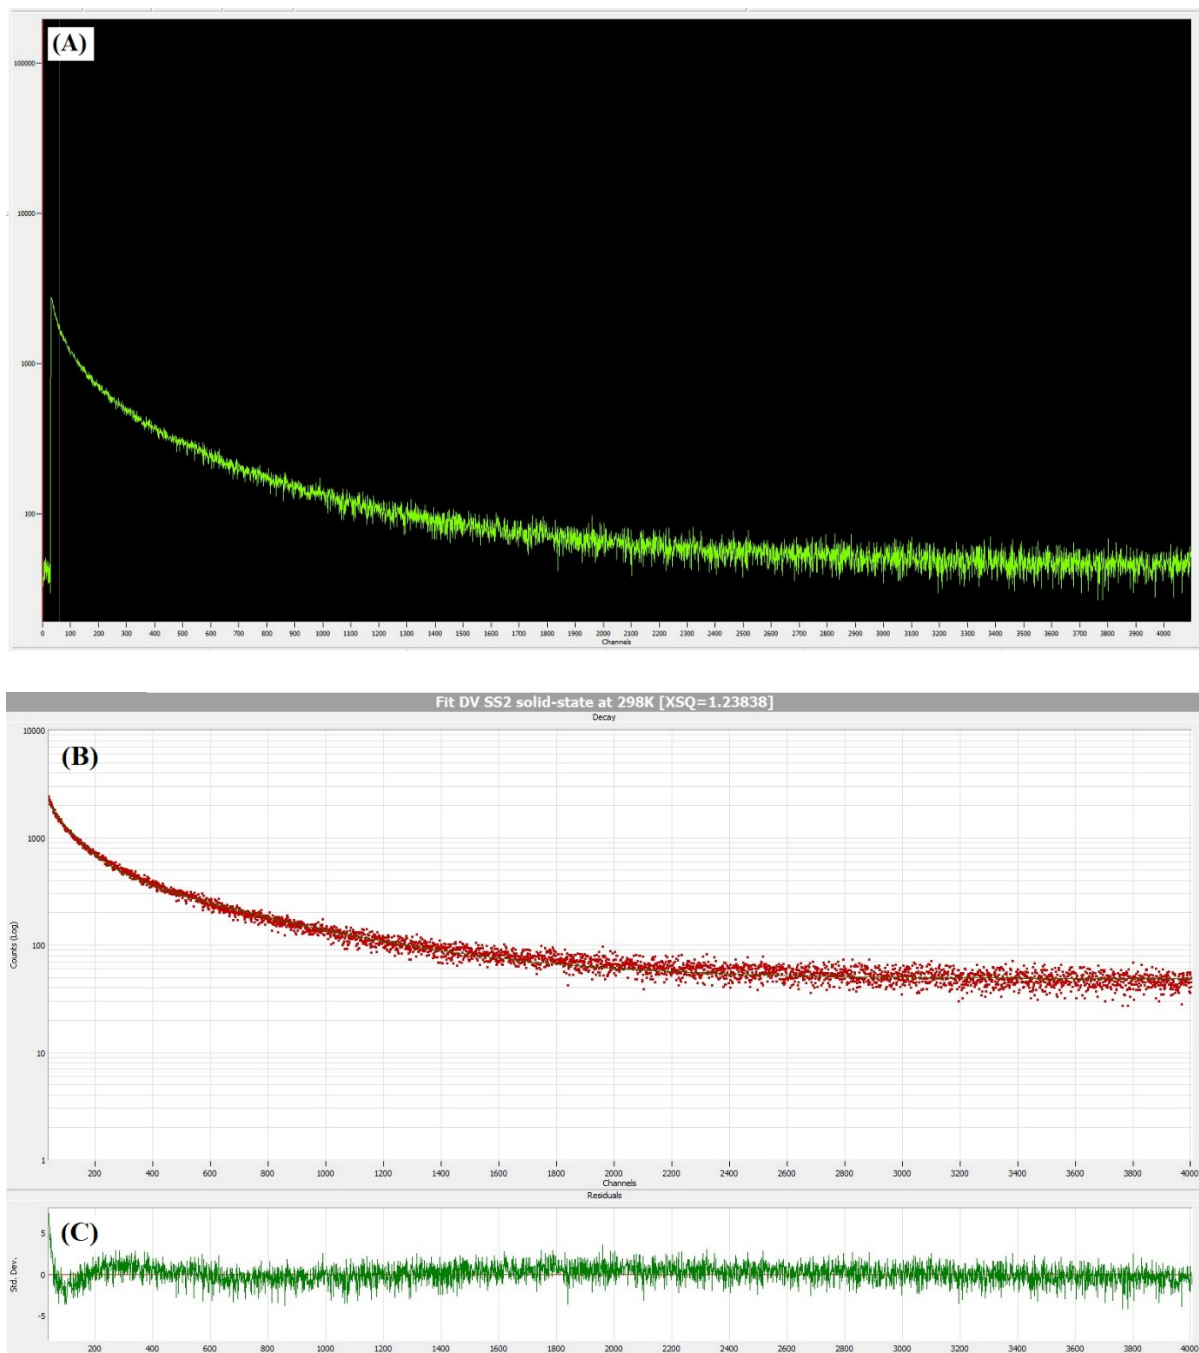

**Figure S23.** (A) Emission decay, (B) best fit and (C) residuals of **1** in solid-state at rt;  $\chi^2 = 1.238$

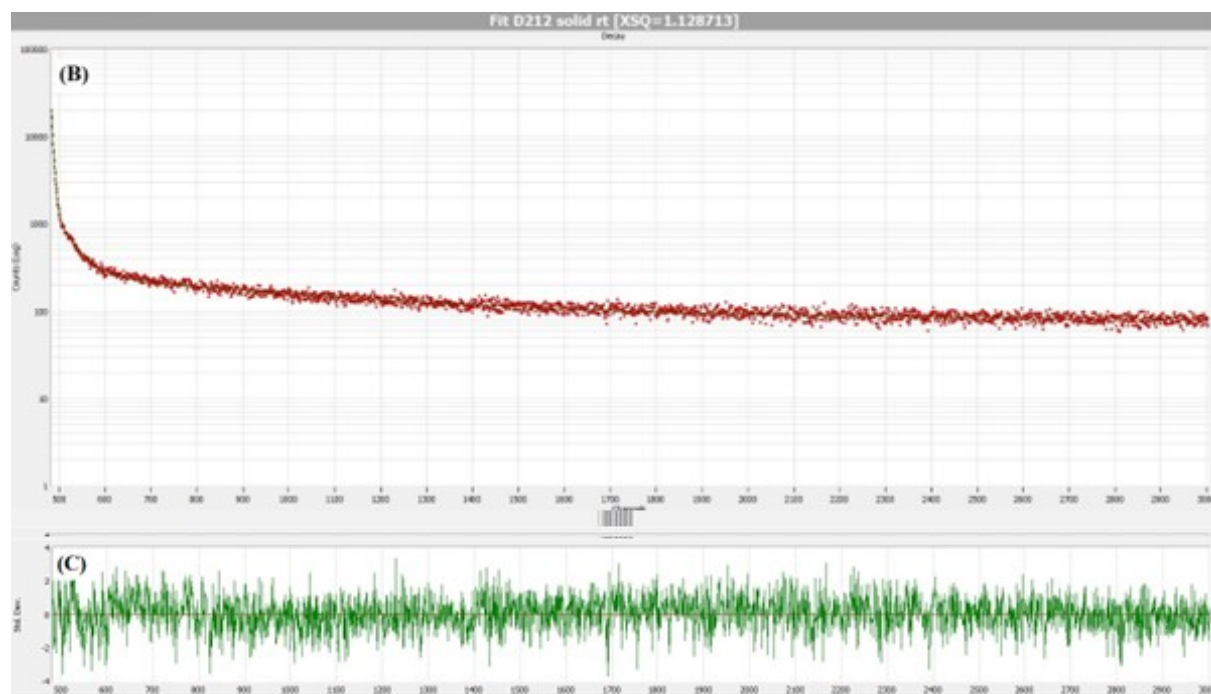

**Figure S24.** (A) Emission decay, (B) best fit and (C) residuals of **2** in solid-state at rt;  $\chi^2 = 1.128$ .

**Table S1.** Selected interatomic distances (Å) and angles (°) in the (bpy-H<sup>+</sup>) cation of **1**.

| Bond length (Å) |            | Bond angles (°) |            |
|-----------------|------------|-----------------|------------|
| N1—H1           | 0.8800     | C1—N1—H1        | 120.9      |
| N1—C1           | 1.433 (7)  | C5—N1—H1        | 120.9      |
| N1—C5           | 1.313 (13) | C5—N1—C1        | 118.3 (6)  |
| N2—C6           | 1.444 (13) | C10—N2—C6       | 114.5 (7)  |
| N2—C10          | 1.302 (13) | N1—C1—H1A       | 119.5      |
| C1—H1A          | 0.9500     | C2—C1—N1        | 121.0 (5)  |
| C1—C2           | 1.389 (7)  | C2—C1—H1A       | 119.5      |
| C2—H2           | 0.9500     | C1—C2—H2        | 120.0      |
| C2—C3           | 1.370 (7)  | C3—C2—C1        | 119.9 (5)  |
| C3—H3           | 0.9500     | C3—C2—H2        | 120.0      |
| C3—C4           | 1.372 (7)  | C2—C3—H3        | 119.6      |
| C4—H4           | 0.9500     | C2—C3—C4        | 120.8 (5)  |
| C4—C5           | 1.476 (15) | C4—C3—H3        | 119.6      |
| C5—C6           | 1.479 (4)  | C3—C4—H4        | 121.0      |
| C6—C7           | 1.279 (13) | N2—C10—H10      | 116.9      |
| C7—H7           | 0.9500     | C9—C10—H10      | 116.9      |
| C7—C8           | 1.397 (11) | N2—C10—C9       | 126.1 (8)  |
| C8—H8           | 0.9500     | N1—C5—C6        | 127.6 (11) |
| C8—C9           | 1.438 (12) | C4—C5—C6        | 109.7 (9)  |
| C9—H9           | 0.9500     | N2—C6—C5        | 114.3 (10) |
| C9—C10          | 1.347 (14) | C3—C4—C5        | 118.1 (5)  |
| C10—H10         | 0.9500     | C5—C4—H4        | 121.0      |
|                 |            | N1—C5—C4        | 121.1 (5)  |
|                 |            | C7—C6—N2        | 123.6 (3)  |
|                 |            | C7—C6—C5        | 122.1 (10) |
|                 |            | C6—C7—H7        | 119.6      |
|                 |            | C6—C7—C8        | 120.7 (7)  |
|                 |            | C8—C7—H7        | 119.6      |
|                 |            | C7—C8—H8        | 121.6      |
|                 |            | C7—C8—C9        | 116.8 (7)  |
|                 |            | C9—C8—H8        | 121.6      |
|                 |            | C8—C9—H9        | 121.2      |
|                 |            | C10—C9—C8       | 117.6 (4)  |
|                 |            | C10—C9—H9       | 121.2      |

**Table S2.** Hydrogen bonds geometry (Å, °) for the compound **1**.

| <i>D</i> —H $\cdots$ <i>A</i>     | <i>D</i> —H | H $\cdots$ <i>A</i> | <i>D</i> $\cdots$ <i>A</i> | <i>D</i> —H $\cdots$ <i>A</i> |
|-----------------------------------|-------------|---------------------|----------------------------|-------------------------------|
| N1—H1 $\cdots$ I4 <sup>iii</sup>  | 0.88        | 3.23                | 4.100 (5)                  | 171                           |
| C2—H2 $\cdots$ I4 <sup>iv</sup>   | 0.95        | 3.12                | 4.034 (6)                  | 163                           |
| C4—H4 $\cdots$ I1                 | 0.95        | 2.88                | 3.673 (5)                  | 142                           |
| C7—H7 $\cdots$ I4 <sup>iii</sup>  | 0.95        | 3.22                | 4.152 (8)                  | 168                           |
| C9—H9 $\cdots$ I2 <sup>v</sup>    | 0.95        | 3.23                | 3.942 (7)                  | 134                           |
| C9—H9 $\cdots$ I3 <sup>v</sup>    | 0.95        | 3.11                | 3.890 (6)                  | 140                           |
| C10—H10 $\cdots$ I2 <sup>vi</sup> | 0.95        | 3.16                | 4.082 (9)                  | 164                           |

*Symmetry codes:* (iii)  $x+1, y, z$ ; (iv)  $x+1/2, -y+1/2, z-1/2$ ; (v)  $x+1/2, y+1/2, z$ ; (vi)  $x, -y+1, z-1/2$ .

**Table S3.** Selected interatomic distances (Å) and angles (°) in the (Qx-H<sup>+</sup>) cation and MeOH of **2**.

| Bond length (Å) |            | Bond angles (°) |            |
|-----------------|------------|-----------------|------------|
| O1—H1B          | 0.8400     | C9—O1—H1B       | 109.5      |
| O1—C9           | 1.414 (14) | O1—C9—H9A       | 109.5      |
| C9—H9A          | 0.9800     | O1—C9—H9B       | 109.5      |
| C9—H9B          | 0.9800     | O1—C9—H9C       | 109.5      |
| C9—H9C          | 0.9800     | H9A—C9—H9B      | 109.5      |
| N1—H1           | 0.8800     | H9A—C9—H9C      | 109.5      |
| N1—C1           | 1.346 (13) | H9B—C9—H9C      | 109.5      |
| N1—C8           | 1.324 (10) | C1—N1—H1        | 119.6      |
| N2—C6           | 1.346 (12) | C8—N1—H1        | 119.6      |
| N2—C7           | 1.305 (13) | C8—N1—C1        | 120.7 (7)  |
| C1—C2           | 1.430 (13) | C7—N2—C6        | 120.6 (7)  |
| C1—C6           | 1.421 (9)  | N1—C1—C2        | 118.2 (10) |
| C2—H2           | 0.91 (7)   | N1—C1—C6        | 119.1 (8)  |
| C2—C3           | 1.369 (11) | C6—C1—C2        | 122.6 (12) |
| C3—H3           | 0.9500     | C1—C2—H2        | 122 (5)    |
| C3—C4           | 1.417 (12) | C3—C2—C1        | 116.2 (13) |
| C4—H4           | 0.97 (6)   | C3—C2—H2        | 121 (5)    |
| C4—C5           | 1.386 (13) | C2—C3—H3        | 118.9      |
| C5—H5           | 0.96 (8)   | C2—C3—C4        | 122.2 (12) |
| C5—C6           | 1.415 (10) | C4—C3—H3        | 118.9      |
| C7—H7           | 0.96 (8)   | C3—C4—H4        | 116 (4)    |
| C7—C8           | 1.390 (12) | C5—C4—C3        | 122.0 (12) |
| C8—H8           | 1.03 (7)   | C5—C4—H4        | 122 (4)    |
| N1A—H1A         | 0.8800     | C4—C5—H5        | 127 (5)    |
| N1A—C1A         | 1.39 (4)   | C4—C5—C6        | 117.9 (10) |

|         |          |             |            |
|---------|----------|-------------|------------|
| N1A—C8A | 1.29 (3) | C6—C5—H5    | 114 (5)    |
| N2A—C6A | 1.47 (3) | N2—C6—C1    | 118.6 (8)  |
| N2A—C7A | 1.29 (2) | N2—C6—C5    | 122.3 (7)  |
| C1A—C2A | 1.39 (3) | C5—C6—C1    | 119.1 (9)  |
| C1A—C6A | 1.37 (3) | N2—C7—H7    | 122 (5)    |
| C2A—H2A | 0.9500   | N2—C7—C8    | 121.4 (7)  |
| C2A—C3A | 1.33 (3) | C8—C7—H7    | 117 (5)    |
| C3A—H3A | 0.9500   | N1—C8—C7    | 119.4 (8)  |
| C3A—C4A | 1.38 (3) | N1—C8—H8    | 115 (4)    |
| C4A—H4A | 0.9500   | C7—C8—H8    | 125 (4)    |
| C4A—C5A | 1.35 (3) | C1A—N1A—H1A | 119.7      |
| C5A—H5A | 0.9500   | C8A—N1A—H1A | 119.7      |
| C5A—C6A | 1.37 (2) | C8A—N1A—C1A | 121 (2)    |
| C7A—H7A | 0.9500   | C7A—N2A—C6A | 115 (2)    |
| C7A—C8A | 1.40 (2) | N1A—C1A—C2A | 132 (4)    |
| C8A—H8A | 0.9500   | C6A—C1A—N1A | 117 (3)    |
|         |          | C6A—C1A—C2A | 111 (4)    |
|         |          | C1A—C2A—H2A | 115.8      |
|         |          | C3A—C2A—C1A | 128 (5)    |
|         |          | C3A—C2A—H2A | 115.8      |
|         |          | C2A—C3A—H3A | 120.6      |
|         |          | C2A—C3A—C4A | 119 (4)    |
|         |          | C4A—C3A—H3A | 120.6      |
|         |          | C3A—C4A—H4A | 122.4      |
|         |          | C5A—C4A—C3A | 115 (4)    |
|         |          | C5A—C4A—H4A | 122.4      |
|         |          | C4A—C5A—H5A | 117.7      |
|         |          | C4A—C5A—C6A | 125 (3)    |
|         |          | C6A—C5A—H5A | 117.7      |
|         |          | C1A—C6A—N2A | 122 (2)    |
|         |          | C1A—C6A—C5A | 122 (3)    |
|         |          | C5A—C6A—N2A | 116 (2)    |
|         |          | N2A—C7A—H7A | 118.9      |
|         |          | N2A—C7A—C8A | 122.3 (18) |
|         |          | C8A—C7A—H7A | 118.9      |
|         |          | N1A—C8A—C7A | 123 (2)    |
|         |          | N1A—C8A—H8A | 118.7      |
|         |          | C7A—C8A—H8A | 118.7      |

**Table S4.** Hydrogen bonds geometry (Å, °) for the compound **2**.

| <i>D—H⋯A</i>                               | <i>D—H</i> | <i>H⋯A</i> | <i>D⋯A</i> | <i>D—H⋯A</i> |
|--------------------------------------------|------------|------------|------------|--------------|
| O1—H1 <i>B</i> ⋯I2 <sup>iii</sup>          | 0.84       | 2.92       | 3.680 (11) | 152          |
| C9—H9 <i>A</i> ⋯I2 <sup>iv</sup>           | 0.98       | 3.27       | 4.04 (3)   | 137          |
| C9—H9 <i>A</i> ⋯I3 <sup>iv</sup>           | 0.98       | 3.13       | 3.91 (4)   | 138          |
| C9—H9 <i>B</i> ⋯I3 <sup>iii</sup>          | 0.98       | 3.20       | 3.88 (4)   | 127          |
| C2 <i>A</i> —H2 <i>A</i> ⋯I2 <sup>iv</sup> | 0.95       | 3.12       | 4.05 (5)   | 165          |
| C7 <i>A</i> —H7 <i>A</i> ⋯I1               | 0.95       | 3.12       | 3.856 (17) | 136          |
| C7 <i>A</i> —H7 <i>A</i> ⋯I4 <sup>v</sup>  | 0.95       | 3.17       | 3.849 (19) | 130          |
| C2—H2⋯I2 <sup>iv</sup>                     | 0.92 (8)   | 3.22 (8)   | 4.039 (17) | 149 (6)      |
| C5—H5⋯I3 <sup>vi</sup>                     | 0.98 (9)   | 3.23 (9)   | 4.195 (12) | 172 (7)      |
| C7—H7⋯I1 <sup>v</sup>                      | 0.96 (9)   | 3.29 (9)   | 3.784 (19) | 114 (6)      |
| C7—H7⋯I4 <sup>v</sup>                      | 0.96 (9)   | 3.24 (8)   | 3.857 (10) | 124 (6)      |
| C8—H8⋯I1                                   | 1.03 (7)   | 3.21 (7)   | 3.956 (10) | 130 (5)      |
| C8—H8⋯I4 <sup>iii</sup>                    | 1.03 (7)   | 3.30 (7)   | 3.816 (12) | 112 (4)      |

*Symmetry codes:* (iii)  $x+1, y, z$ ; (iv)  $-x+1, -y+2, -z$ ; (v)  $-x+1, -y+1, -z+1$ ; (vi)  $x, y-1, z$ .

**Table S5.** Frequencies ( $\text{cm}^{-1}$ ) of the observed Raman and infrared bands of **1** and proposed assignments.

| Wavenumber ( $\text{cm}^{-1}$ ) |          | Assignment                                                             |
|---------------------------------|----------|------------------------------------------------------------------------|
| Raman                           | Infrared |                                                                        |
| 55                              |          | Bending modes                                                          |
| 77                              |          |                                                                        |
| 88                              |          |                                                                        |
| 95                              |          | Sb–I <sub>(bridge)</sub> stretching                                    |
| 112                             |          |                                                                        |
| 126                             |          |                                                                        |
| 156                             |          |                                                                        |
|                                 | 423      | Sb–I <sub>(external)</sub> stretching<br>$\gamma$ (heterocyclic ring)  |
|                                 | 441      |                                                                        |
|                                 | 542      |                                                                        |
|                                 | 610      | heterocyclic ring torsion<br>$\delta(\text{CCC}) + \delta(\text{CCN})$ |
|                                 | 635      |                                                                        |
|                                 | 718      | $\gamma(\text{C}=\text{C}) + \gamma(\text{C}=\text{N})$                |
|                                 | 737      |                                                                        |
|                                 | 761      | $\gamma(\text{C}-\text{H})_{\text{aromatic}}$                          |
|                                 | 811      |                                                                        |
|                                 | 935      |                                                                        |
|                                 | 998      | $\beta(\text{C}-\text{H})_{\text{aromatic}}$                           |
|                                 | 1008     |                                                                        |
|                                 | 1035     |                                                                        |
|                                 | 1063     |                                                                        |
|                                 | 1081     |                                                                        |
|                                 | 1153     |                                                                        |
|                                 | 1166     |                                                                        |
|                                 | 1209     |                                                                        |
|                                 | 1249     |                                                                        |
|                                 | 1349     |                                                                        |
|                                 | 1427     | $\nu(\text{C}=\text{C}) + \nu(\text{C}=\text{N})$                      |
|                                 | 1451     |                                                                        |
|                                 | 1465     |                                                                        |
|                                 | 1520     |                                                                        |
|                                 | 1578     |                                                                        |
|                                 | 1594     |                                                                        |
|                                 | 1612     |                                                                        |
|                                 | 2887     |                                                                        |
|                                 | 2930     |                                                                        |
|                                 | 2974     |                                                                        |
|                                 | 3043     | $\nu(\text{C}-\text{H})_{\text{aromatic}}$                             |
|                                 | 3081     |                                                                        |
|                                 | 3205     |                                                                        |
|                                 | 3250     |                                                                        |
|                                 |          | $\nu(\text{NH}^+)$                                                     |

v: stretching,  $\delta$ : deformation,  $\beta$ : in plane bending,  $\gamma$ : out of plane bending

**Table S6.** Frequencies ( $\text{cm}^{-1}$ ) of the observed Raman and infrared bands of **2** and proposed assignments.

| Wavenumber ( $\text{cm}^{-1}$ ) |          | Assignment                                              |
|---------------------------------|----------|---------------------------------------------------------|
| Raman                           | Infrared |                                                         |
| 55                              |          | Bending modes                                           |
| 73                              |          |                                                         |
| 93                              |          | Bi-I <sub>(bridge)</sub> stretching                     |
| 122                             |          |                                                         |
| 141                             |          | Bi-I <sub>(external)</sub> stretching                   |
|                                 | 453      | $\delta(\text{CCC})$                                    |
|                                 | 472      |                                                         |
|                                 | 524      | $\delta(\text{CCN})$                                    |
|                                 | 600      |                                                         |
|                                 | 756      | $\gamma(\text{C}=\text{C}) + \gamma(\text{C}=\text{N})$ |
|                                 | 799      |                                                         |
|                                 | 844      |                                                         |
|                                 | 869      |                                                         |
|                                 | 906      | $\gamma(\text{CCH})_{\text{aromatic}}$                  |
|                                 | 943      |                                                         |
|                                 | 970      |                                                         |
|                                 | 1037     | $\nu(\text{C}-\text{O})_{\text{methanol}}$              |
|                                 | 1071     |                                                         |
|                                 | 1129     | $\delta(\text{CCH})_{\text{aromatic}}$                  |
|                                 | 1141     |                                                         |
|                                 | 1184     |                                                         |
|                                 | 1218     |                                                         |
|                                 | 1245     |                                                         |
|                                 | 1334     | $\nu(\text{C}=\text{C})$                                |
|                                 | 1352     |                                                         |
|                                 | 1395     |                                                         |
|                                 | 1459     |                                                         |
|                                 | 1517     |                                                         |
|                                 | 1566     | $\nu(\text{C}=\text{NH}^+)$                             |
|                                 | 1603     |                                                         |
|                                 | 1615     |                                                         |
|                                 | 3026     | $\nu(\text{C}-\text{H})_{\text{methanol}}$              |
|                                 | 3063     |                                                         |
|                                 | 3125     | $\nu(\text{C}-\text{H})_{\text{aromatic}}$              |
|                                 | 3155     |                                                         |
|                                 | 3197     | $\nu(\text{NH}^+)$                                      |
|                                 | 3234     |                                                         |
|                                 | 3455     | $\nu(\text{O}-\text{H})_{\text{methanol}}$              |



## References

- 1 M. D. Petrov, M. N. Sokolov, V. P. Fedin and S. A. Adonin, *J. Struct. Chem.*, 2020, **61**, 1794-1799. <https://doi.org/10.1134/S0022476620110128>.
- 2 A. Lipka, *Zeitschrift für Naturforschung B*, 1983, **38**, 1615–1621. <https://doi.org/10.1515/znb-1983-1213>.
